# 1 $\beta$ -HPV 8E6 Dysregulates the Hippo 2 Signaling Pathway and Induces Aneuploidy

3  
4 Dalton Dacus<sup>1</sup>, Tristan X. McCallister<sup>1</sup>, Celeste Cotton<sup>1,2</sup>, Elizabeth Riforgiate<sup>1</sup>, Nicholas A.  
5 Wallace<sup>1\*</sup>

6 1. Division of Biology, Kansas State University, Manhattan, Kansas, USA  
7 2. Langston University, Langston OK, USA

8 \*Corresponding Author: [nwallac@ksu.edu](mailto:nwallac@ksu.edu)

9

## 10 ABSTRACT:

11 Beta genus human papillomaviruses ( $\beta$ -HPVs) are associated with cutaneous squamous cell  
12 carcinomas (cSCCs) in a subset of immunocompromised patients. Although  $\beta$ -HPVs are not  
13 necessary for tumor maintenance, they are hypothesized to destabilize the genome in the early  
14 stages of cancer development. Supporting this idea,  $\beta$ -HPV's 8E6 protein attenuates p53  
15 accumulation after failed cytokinesis. This paper identifies the mechanism of this abatement. We  
16 show  $\beta$ -HPV 8E6 dysregulates the Hippo signaling pathway (HP). It increases pro-proliferative  
17 gene expression, enhances TEAD activity and promotes cell growth.  $\beta$ -HPV 8E6 also reduces  
18 LATS activation and p53-mediated apoptosis following unsuccessful division of mitotic cells.  
19 These phenotypes are dependent on  $\beta$ -HPV 8E6 binding and destabilizing a cellular histone  
20 acetyltransferase, p300. Despite circumventing apoptosis,  $\beta$ -HPV 8E6 caused increased  
21 senescence after unsuccessful cytokinesis. We linked this lack of growth to the viral protein's  
22 inability to prevent cytoplasmic sequestration of the HP transcription factor, YAP. We also show  
23 that increased telomerase reverse transcriptase activity (a common alteration in cSCCs) acts  
24 synergistically with  $\beta$ -HPV 8E6 to promote cellular proliferation after abortive cytokinesis.  
25 While  $\beta$ -HPV 8E6 promoted aneuploidy on its own, this genome destabilization is amplified in  
26 cells that do not divide after mitosis. Although our group and others have previously described  
27 inhibition of DNA repair, to the best of our knowledge this marks the first time that a  $\beta$ -HPV  
28 protein has been connected to chromosome level changes in the cellular genome. This represents  
29 a substantial escalation in the known genome destabilizing properties likely to occur during a  $\beta$ -  
30 HPV infection.

31

## 32 IMPORTANCE:

33 There is mounting evidence that  $\beta$ -HPVs contribute to cSCCs development in  
34 immunocompromised populations. They may also augment UV's mutagenic potential, increasing  
35 cancer risk in the general population. We demonstrate that  $\beta$ -HPV 8E6 dysregulates the Hippo  
36 signaling pathway (HP). HP regulates cell growth and apoptosis in response to a myriad of  
37 stimuli, including failed cytokinesis.  $\beta$ -HPV 8E6 attenuates phosphorylation of the HP kinase,  
38 LATS, decreasing some but not all downstream signaling events. This allows binucleated cells to  
39 avoid apoptosis, however they succumb to senescence. We show that  $\beta$ -HPV 8E6 synergizes  
40 with a common cSCC mutation (telomerase activation) to avoid both apoptosis and senescence.  
41 We did not find any telomerase immortalized  $\beta$ -HPV 8E6 expressing cells that were not  
42 aneuploid after aberrant cytokinesis. This represents a substantial escalation in  $\beta$ -HPV E6's  
43 known mutagenic potential.

44

45

## 46 INTRODUCTION:

47 The human papillomavirus (HPV) family includes over 200 double-stranded DNA viruses that  
48 are divided into five genera, all of which infect human epithelia (1). Upon infecting mucosal or

49 cutaneous tissue, members of each genera can cause a broad array of pathologies. Of these, the  
50 most prominent diseases are the anogenital and oropharyngeal carcinomas caused by alpha genus  
51 HPVs (2, 3). Cutaneous beta genus HPVs ( $\beta$ -HPVs) have also been linked to tumorigenesis via  
52 high viral DNA loads in cutaneous squamous cell carcinomas (cSCCs) of immunocompromised  
53 patients, primarily in areas of the skin exposed to the sun (4–6).

54  
55  $\beta$ -HPV infections are common in the general population, but their contribution to cSCCs is less  
56 clear in immune competent individuals. The main aetiological factor in skin cancer pathogenesis  
57 is UV. Further, characterizations of cSCCs in the general population do not find continued  $\beta$ -  
58 HPV expression (7–9). Viral loads decrease as lesions progress from precancerous actinic  
59 keratosis (AK) lesions to cSCCs (10–12). These data have led to the hypothesized “hit and run”  
60 mechanism of oncogenesis, where  $\beta$ -HPVs cooperate with UV to enhance genomic instability in  
61 the early stages of carcinogenesis (10, 13, 14). The elevated mutational load then increases the  
62 chances of tumor progression independent of continued viral gene expression.

63  
64 While it is hard to prove the role of a transient viral infection in a persistent cancer,  $\beta$ -HPVs are  
65 also a common resident of our skin and frequently found in AKs. Despite the billions of dollars  
66 spent on sun care products annually, 58 million Americans still have one or more AKs.  
67 Moreover, over \$1 billion is spent during 5.2 million outpatient visits each year for AK treatment  
68 (15, 16). This cost, along with the emotional toll increases if these lesions develop into  
69 malignancies. Within 1 year of diagnosis an estimated 0.6% of AKs progress to cSCCs. This  
70 progression expands to 2.6% of AKs 5 years after diagnosis (17). Thus, it is important to broadly  
71 understand how these widespread infections alter the cell’s ability to maintain genome stability.

72  
73 A great deal is known about the tumorigenic potential of  $\beta$ -HPV proteins, particularly the E6  
74 protein. The E6 putative oncogene from  $\beta$ -HPV 8 ( $\beta$ -HPV 8E6) is enough to cause cancers in  
75 mice without UV exposure (18, 19).  $\beta$ -HPV 8E6 inhibits differentiation and promotes  
76 proliferation by targeting the NOTCH and TGF- $\beta$  signaling pathways (20). Another central  
77 theme of  $\beta$ -HPV E6 proteins binding the cellular histone acetyltransferase p300, has emerged  
78 (21–24).  $\beta$ -HPV 8E6 and the E6 from  $\beta$ -HPV 5 ( $\beta$ -HPV 5E6) bind p300 strongly, leading to its  
79 destabilization and decreasing DNA damage repair (DDR) gene expression (22, 25, 26).  $\beta$ -HPV  
80 type 38 E6 (HPV38 E6) has a lower p300 binding affinity and cannot destabilize the cellular  
81 protein (27). Nevertheless, binding p300 is essential for HPV38-induced immortalization of  
82 human foreskin keratinocytes (HFKs). This suggests that p300 binding may be a shared factor in  
83  $\beta$ -HPV promoted oncogenesis (28). Because p300 is a master regulator of gene expression (29,  
84 30), there are likely other signaling pathways altered by  $\beta$ -HPV 8E6’s destabilization of the  
85 histone acetyltransferase.

86  
87 Approximately 10% of skin cells do not divide after entering mitosis (25, 31).  $\beta$ -HPV 8E6 allows  
88 these cells to remain proliferative by preventing p53 stabilization in a p300-dependent manner  
89 (25). p53 accumulation requires the activation of LATS, a kinase in the Hippo signaling pathway  
90 (HP) (32). It also prevents growth by inhibiting the pro-proliferative activity of YAP/TAZ (32–

91 34). We hypothesize that  $\beta$ -HPV 8E6 dysregulates the HP after aborted cytokinesis via p300  
92 destabilization, causing a decrease in p53 levels and an increase in YAP/TAZ driven cell growth.

93  
94 Our analysis of transcriptomic data from cell lines with or without decreased p300 expression  
95 identified canonical HP and downstream HP-activated pro-proliferative genes that are negatively  
96 regulated by p300. We confirm this in primary cell culture and show that  $\beta$ -HPV 8E6 hinders  
97 LATS phosphorylation and prevents p53-induced apoptosis after cytokinesis failure. Senescence  
98 instead prevents the long-term expansion of cells recovering from becoming binucleated.  
99 However, telomerase reverse transcriptase (*TERT*) activation acts synergistically with  $\beta$ -HPV  
100 8E6 to avoid apoptosis and senescence allowing these aberrant cells to proliferate. Consistent  
101 with enhanced tolerance of aberrant cytokinesis,  $\beta$ -HPV 8E6 increases aneuploidy.

## 102 **METHODS:**

### 103 **Cell Culture**

104 U2OS cells were maintained in DMEM supplemented with 10% FBS and penicillin-  
105 streptomycin. Primary HFKs were derived from neonatal human foreskins. HFKs and *TERT*-  
106 immortalized HFKs (obtained from Michael Underbrink, University of Texas Medical Branch)  
107 were grown in EpiLife medium supplemented with calcium chloride (60  $\mu$ M), human  
108 keratinocyte growth supplement (ThermoFisher Scientific), and penicillin-streptomycin. HPV  
109 genes were cloned, transfected, and confirmed as previously described (25).

### 111 **Proliferation Assays and H2CB Cell Viability Assays**

112 Cells were counted and  $4.0 \times 10^4$  cells were plated into 6 wells per cell line of 6-well tissue  
113 cultures dishes. One well was trypsinized, resuspended and counted 3 times via hemocytometer  
114 with trypan blue. For dihydrocytochalasin B (H2CB) cell viability assays, cells were grown for  
115 24 h then treated with  $2/4 \mu$ M of H2CB, re-administering fresh H2CB every 2 days while cells  
116 were trypsinized and counted 3 times via hemocytometer with trypan blue.

### 118 **RT-qPCR**

119 Cell were lysed using Trizol (Invitrogen) and RNA isolated with the RNeasy kit (Qiagen).  
120 Two micrograms of RNA were reverse transcribed using the iScript cDNA Synthesis Kit (Bio-  
121 Rad). Quantitative real time-PCR (RT-qPCR) was performed in triplicate with the TaqMan  
122 FAM-MGB Gene Expression Assay (Applied Biosystems) and C1000 Touch Thermal Cycler  
123 (Bio-Rad). The following probes (Thermo Scientific) were used: ACTB (Hs01060665\_g1),  
124 STK4 (Hs00178979\_m1), LATS2 (Referred to as LATS in the text) (Hs01059009\_m1), YAP1  
125 (Hs00902712\_g1), CTGF (Hs00170014\_m1), CYR61 (Hs00155479\_m1).

### 127 **Immunoblotting**

128 After being washed with ice cold PBS, cells were lysed with RIPA Lysis Buffer (VWR Life  
129 Science) supplemented with Phosphatase Inhibitor Cocktail 2 (Sigma) and Protease Inhibitor  
130 Cocktail (Bimake). The Pierce BCA Protein Assay Kit (Thermo Scientific) was used to  
131 determine protein concentration. Equal protein lysates were run on Novex 4-12% Tris-Glycine  
132 WedgeWell Mini Gels (Invitrogen) and transferred to Immobilon-P membranes (Millipore).  
133 Membranes were then probed with the following primary antibodies: p53 (Calbiochem, OP43-  
134 100UG), HA-tag (Cell Signaling Technologies 3724S), GAPDH (Santa Cruz Biotechnologies sc-

135 47724), LATS2 (Referred to as LATS in the text, Cell Signaling Technologies D83D6),  
136 Phospho-LATS1/2 (Referred to as pLATS in the text, Ser909) (Cell Signaling Technologies  
137 #9157), YAP (Cell Signaling Technologies 4912S), Phospho-YAP (Ser127) (Cell Signaling  
138 Technologies 4911S), C23 (Nucleolin) (Santa Cruz Biotechnologies sc-8031 HRP), MST2 (Cell  
139 Signaling Technologies 3952S), 14-3-3 Theta/Tau (Millipore Sigma T5942-.1MG). After  
140 exposure to the matching HRP-conjugated secondary antibody, cells were visualized using  
141 SuperSignal West Femto Maximum Sensitivity Substrate (Thermo Scientific).

142

### 143 **cBioPortal and Gene Ontology Analysis**

144 Software from ([www.cbioportal.org](http://www.cbioportal.org)) was used to recognize, analyze, and categorize mutations  
145 and transcriptomic data from over 1000 cancer cells lines (35–37) and cutaneous squamous cell  
146 carcinomas (38, 39). Gene Ontology enRIchment anaLysis and visuaLizAtion tool (GORilla)  
147 identified and visualized enriched GO terms from these data (40, 41). Analysis of the squamous  
148 cell carcinoma samples was done at (<http://geneontology.org/>) powered by Protein ANalysis  
149 THrough Evolutionary Relationships (PANTHER) (42, 43). The Kyoto Encyclopedia of Genes  
150 and Genomes (KEGG) was used to identify genes specific to the Hippo signaling pathway  
151 (hsa04390).

152

### 153 **Senescence-associated $\beta$ -galactosidase Staining**

154 Cells were seeded onto 3 6-well plates and were grown for 24 h. Then, they were treated with 4  
155  $\mu$ M of H2CB for stated times then cells were fixed and stained for senescence-associated  $\beta$ -  
156 galactosidase ( $\beta$ -Gal) expression according to the manufacturer's protocol (Cell Signaling  
157 Technologies).

158

### 159 **Immunofluorescence Microscopy**

160 Cells were seeded onto either 96-well glass bottom plates (Cellvis) or coverslips and grown  
161 overnight. Cells treated with H2CB for specified time and amount of H2CB were fixed with 4%  
162 formaldehyde. Then 0.1% Triton-X solution in PBS was used to permeabilize the cells, followed  
163 by blocking with 3% bovine serum albumin in PBS for 30 minutes. Cell were then incubated  
164 with the following: p53 (Cell Signaling Technologies 1C12), YAP (Cell Signaling Technologies  
165 4912S), Ki67 (Abcam ab15580), alpha tubulin (Abcam ab18251). The cells were then washed  
166 and stained with the appropriate secondary antibodies: Alexa Fluor 594 goat anti-rabbit (Thermo  
167 Scientific A11012), Alexa Fluor 488 goat anti-mouse (Thermo Scientific A11001). Washed with  
168 PBS 2X and stained with 28  $\mu$ M DAPI in PBS for 12 min before a final wash in PBS and  
169 visualization with Zeiss LSM 770 microscope. Foci were analyzed using ImageJ previously  
170 described in (44).

171

### 172 **Luciferase Reporter Assays**

173 Reporter assays were performed using Dual-Luciferase Reporter Assays System (Promega).  
174 Transfected cell lysates with 8xGTIIc-luciferase, a gift from Stefano Piccolo (Addgene plasmid  
175 #34615 ; (<http://n2t.net/addgene:34615>) ; RRID:Addgene\_34615) were prepared in 100  $\mu$ l of  
176 passive lysis buffer 48 h post transfection and 40  $\mu$ l of lysate was used for each reading.  
177 Readings were done in triplicate using GloMax Navigator Microplate Luminometer (Promega)  
178 and values were normalized for transfection efficiency using co-transfected renilla luciferase  
179 plasmid.

180

## 181 **Apoptosis Assay**

182 After H2CB treatment, HFKs were harvested via trypsinization then counted while incubating at  
183 37°C for 30 min. After incubation cells were resuspended to  $1 \times 10^6$  cells/ml. Next, cells were  
184 stained with 100  $\mu\text{g/ml}$  of propidium iodide and 1X annexin-binding buffer following the  
185 protocol from Dead Cell Apoptosis Kit (Invitrogen V13242). Stained cells were imaged with the  
186 Countess II FL Automated Cell Counter (Invitrogen). Images were processed using ImageJ  
187 software.

188

## 189 **Sub-Cellular Fractionation**

190 Cells were seeded at  $5.0 \times 10^5$  cells/ $10 \text{ cm}^2$  plate and grown for 24 h. Cells were then treated  
191 with 4  $\mu\text{M}$  H2CB for 3 days, then washed with PBS and recovered in fresh EpiLife for 3 days  
192 (After H2CB treatment). Before and after H2CB exposure, cells were then washed with ice-cold  
193 PBS and divided into cytosolic and nuclear fractions via Abcam's subcellular fractionation  
194 protocol. Afterwards lysates were treated the same as in the Immunoblot section.

195

## 196 **H2CB Recovery Assay**

197 Cells were counted and  $1.0 \times 10^5$  cells were seeded on a  $10 \text{ cm}^2$  tissue culture plate and grown  
198 for 24 h. Cells were then treated with 4  $\mu\text{M}$  H2CB, refreshing the H2CB every 3 days. After 3 or  
199 6 days, the cells were washed with PBS and given fresh EpiLife. Once cells reached 90%  
200 confluency they were counted and  $9.0 \times 10^4$  cells were reseeded. This process was continued for  
201 30 days if possible.

202

## 203 **Chromosome Counts via Metaphase Spread**

204 Before and after H2CB exposure, *TERT*-immortalized HFKs were grown to 80% confluency  
205 then chromosomes were detected and counted as previously described (45).

206

## 207 **Statistical Analysis**

208 Unless otherwise noted, statistical significance was determined by a paired Student *t* test and was  
209 confirmed when appropriate by two-way analysis of variance (ANOVA) with Turkey's  
210 correction. Only *P* values less than 0.05 were reported as significant.

211

## 212 **Figure Legends:**

### 213 **Figure 1: $\beta$ -HPV 8E6 alters Hippo pathway signaling in a p300-dependent manner.**

214 (A) Gene ontology of 1020 cancer cell lines via GOrilla. Boxes show GO biological processes  
215 terms. Boxes descend from general to specific functions. Gold color indicates  $p \leq 0.001$ . (B)  
216 Volcano plot of 154 HP genes in 1020 cancer cell lines with decreased EP300 expression. The  
217 colors blue and purple label pro-proliferative TEAD targets and core HP genes, respectively. The  
218 horizontal line denotes  $p = .05$ . (C) HP and TEAD-regulated genes mRNA expression in HFKs  
219 measured by RT-qPCR and normalized to  $\beta$ -actin mRNA. (D) Representative immunoblots of  
220 HP proteins in HFKs LXSN,  $\beta$ -HPV 8E6 and  $\beta$ -HPV  $\Delta$ 8E6. (E) TEAD-responsive promoter  
221 activity in *TERT*-HFKs. (F) Relative growth recorded over 5-day period. Figures depict means  $\pm$   
222 standard error of mean.  $n \geq 3$ . \* denotes  $p \leq 0.05$ , \*\* denotes  $p \leq 0.01$ , \*\*\* denotes  $p \leq 0.001$ .

223

### 224 **Figure 2: $\beta$ -HPV 8E6 increases tolerance of failed cytokinesis by destabilizing p300.**

225 Representative images of (A) U2OS and (B) HFK cells with and without H2CB. Quantification  
226 of (C) U2OS and (D) HFK cells with 2 or more nuclei as a function of time in H2CB. Relative  
227 counts of (E) U2OS and (F) HFK cells treated with H2CB. Day 0 set to 100. (G) Percent of  
228 HFKs staining positive for Ki67. At least 100 cells/line were imaged in three independent  
229 experiments. Figures depict means  $\pm$  standard error of mean.  $n \geq 3$ . \* denotes  $p \leq 0.05$ , \*\*  
230 denotes  $p \leq 0.01$ , \*\*\* denotes  $p \leq 0.001$ .

231

232 **Figure 3:  $\beta$ -HPV 8E6 hinders LATS activation reducing p53 accumulation after failed**  
233 **cytokinesis.** (A) Representative images of p53 and DAPI staining in cells with and without  
234 H2CB. (B) Percentage of p53 positive U2OS cells. (C) Representative immunoblot of p53 with  
235 and without H2CB. (D) Densitometry of immunoblots described in (C). GAPDH was used as a  
236 loading control. Data was normalized to p53 levels in untreated LXS cells (set to 1). (E)  
237 Percentage of propidium iodide stained HFK cells with and without H2CB. (F) Representative  
238 immunoblot of pLATS and total LATS protein levels in HFK cells with and without H2CB  
239 exposure. (G) Representative images of YAP and DAPI stained HFK cells with and without  
240 H2CB. (H) Relative cytoplasmic YAP intensity in HFK cells. Untreated cytoplasmic YAP  
241 intensity was set to 0. At least 50 cells/line were imaged from three independent experiments (I)  
242 TEAD-responsive promoter activity in U2OS cells treated with H2CB. (J) STK4, LATS, YAP1  
243 expression before and after H2CB exposure measured by RT-qPCR  $n=2$ . Figures depict means  $\pm$   
244 standard error of mean.  $n \geq 3$ . \* denotes  $p \leq 0.05$ , \*\* denotes  $p \leq 0.01$ , \*\*\* denotes  $p \leq 0.001$ .

245

246 **Figure 4:  $\beta$ -HPV 8E6 lowers the frequency of apoptosis in cells with two nuclei.** (A) Percent  
247 of HFK cells with  $\geq 2$  nuclei per cell before, during and after H2CB. (B) Representative  
248 immunoblots of pLATS and total LATS in HFKs before H2CB and after H2CB was removed.  
249 (C) Representative images of p53 and DAPI staining in cells before and after H2CB. (D) Mean  
250 p53 intensity in HFK cells before and after H2CB. At least 200 cells/line were imaged across  
251 three independent experiments. (E) Percent of HFK cells that stained positive for p53 before and  
252 after H2CB. (F) Percentage of propidium iodide stained HFK cells before and after H2CB.  
253 Figures depict means  $\pm$  standard error of mean.  $n \geq 3$ . \* denotes  $p \leq 0.05$ , \*\* denotes  $p \leq 0.01$ ,  
254 \*\*\* denotes  $p \leq 0.001$ .

255

256 **Figure 5:  $\beta$ -HPV 8E6 increases senescence in cells recovering from failed cytokinesis.**  
257 (A) Representative immunofluorescence microscopy images of HFK cells before, during and  
258 after H2CB. Ki67 staining marks proliferating cells. DAPI marks nuclei. (B) Average Ki67  
259 intensity of  $\geq 150$  images of HFK cells before, during and after H2CB. (C) Representative images  
260 of HFK cells stained for  $\beta$ -Gal activity (blue). (D) Quantification of  $\beta$ -Gal positive HFK LXS,  
261  $\beta$ -HPV 8E6 and  $\Delta$ 8E6 cells before, during and after H2CB exposure. (E) Representative images  
262 of HFK cells stained for YAP and with DAPI. (F) Cytoplasmic YAP intensity in HFK cells  
263 before, during, and after H2CB treatment ( $\geq 205$  images from 3 independent experiments). (G)  
264 Subcellular fractionation of HFKs harvested before and after H2CB. Hippo pathway proteins  
265 were probed via immunoblot. GAPDH and nucleolin serve as cytoplasmic and nuclear loading

266 controls, respectively. Figures depict means  $\pm$  standard error of mean.  $n \geq 3$ . \* denotes  $p \leq 0.05$ ,  
267 \*\* denotes  $p \leq 0.01$ , \*\*\* denotes  $p \leq 0.001$ .

268

269 **Figure 6: *TERT* expression promotes senescence bypass and recovery after failed**  
270 **cytokinesis.** (A) GO analysis of common mutations in cSCCs analyzed with PANTHER  
271 software. (B) Percentage of HFKs capable of long-term growth after 3 days H2CB exposure. (C)  
272 Quantification of cells with more than 1 nucleus before, during, and after H2CB exposure. (D)  
273 Quantification of  $\beta$ -Gal staining in HFK cells before, during and after H2CB. (E) Percentage of  
274 cells with  $\geq 2$  nuclei that were  $\beta$ -Gal positive before, during and after H2CB. Figures depict  
275 means  $\pm$  standard error of mean.  $n \geq 3$ . \* denotes  $p \leq 0.05$ , \*\* denotes  $p \leq 0.01$ , \*\*\* denotes  $p \leq$   
276 0.001.

277

278 **Figure 7:  $\beta$ -HPV 8E6 and *TERT* expression synergistically promote genome instability.**  
279 (A) Percentage of HFK cells capable of long-term growth after 6 days in H2CB. (B) Growth  
280 curves for HFK cells after 6 days of H2CB. (C) Representative images of metaphase spreads.  
281 Insert on top right corner shows magnification. (D) Chromosome counts from at least 45 cells  
282 before or after 6 days of H2CB. (E) Relative frequency of diploidy (green), tetraploidy (yellow),  
283 and aneuploidy (red) before and after 6 days of H2CB exposure. Figures depict means  $\pm$  standard  
284 error of mean.  $n \geq 3$ .

285

286 **Supplemental Figure 1:**

287 (A) Representative immunoblot core HP protein levels in HFK cells with and without H2CB  
288 exposure. (B) Representative images of HFK cells stained for  $\beta$ -Gal activity (blue) and  
289 visualization of cytoplasmic vacuoles.

290

## 291 **RESULTS:**

292  **$\beta$ -HPV 8E6 increases TEAD responsive genes in a p300-dependent manner.**

293 Animal models show that certain  $\beta$ -HPV E6 genes can contribute to UV's carcinogenesis (18,  
294 19, 23). *In vitro* studies from our group and others have added molecular details by describing  $\beta$ -  
295 HPV E6's ability to impair the DDR by destabilizing p300 (18, 22, 27, 28, 46). However,  $\beta$ -HPV  
296 E6's oncogenic potential probably extends beyond DDR inhibition, as it can induce skin tumors  
297 in mice without UV exposure (18). Further, p300 is a master transcriptional regulator, meaning  
298 the impact of its destabilization is unlikely to be confined to DDR pathways (29, 30). There are  
299 DDR-independent pathways that protect genome fidelity, whose inhibition would be consistent  
300 with the "hit and run" model by which  $\beta$ -HPV infections are believed to contribute to cSCCs  
301 (47–49). To identify p300-regulated pathways that could contribute to  $\beta$ -HPV E6-associated  
302 genome destabilization, we performed an *in silico* screen by comparing RNAseq data among  
303 1020 cancer cell lines grouped by their relative p300 expression levels, mimicking  $\beta$ -HPV 8E6  
304 expression (Supplementary Data 1) (35, 50, 51). We identified genes that were upregulated ( $p$ -  
305 value $<0.05$ ) when p300 was decreased ( $z$ -score $<-1.64$ ). Next, gene ontology (GO) analysis was  
306 performed using GOrilla to identify pathways that were significantly altered when p300  
307 expression was reduced (52, 53). This revealed significant up-regulation of genes involved in the



308 HP (Fig. 1A), specifically TEAD1/4 which are transcriptional activators that promotes cell  
309 proliferation and restrict apoptosis (54, 55). We then performed a more detailed analysis of the  
310 154 HP genes using KEGG to define the pathway. When p300 expression was reduced, many  
311 canonical HP genes were up-regulated. However, the most striking changes occurred in pro-  
312 proliferative TEAD-responsive genes (CYR61, CTGF, AXL, SERPINE1) (Fig. 1B).

313  
314 Because  $\beta$ -HPV infect the cutaneous epithelia, we chose HFKs as a relevant *in vitro* model for  
315 validating our computational data. Vector control (LXSN),  $\beta$ -HPV 8E6 expressing HFKs were  
316 generated. To confirm p300 dependence, HFKs expressing  $\beta$ -HPV  $\Delta$ 8 E6 (residues 132–136  
317 were deleted) were also generated. This mutant can no longer bind or destabilize p300 (56). RT-  
318 qPCR indicated that  $\beta$ -HPV 8E6 did not significantly change the expression of HP genes (Fig.  
319 1C). However, two pro-proliferative TEAD-responsive genes were upregulated, CTGF and  
320 CYR61 (Fig. 1C). Although, only CTGF's increase was statistically significant these results  
321 parallel our *in silico* analysis (Fig. 1C). To test whether this change in transcription would  
322 manifest at the protein level, we observed HP protein abundance by immunoblot.  $\beta$ -HPV 8E6  
323 increased LATS and CTGF protein levels (Fig. 1D). Confirming HPV E6 expression, p300 was  
324 significantly decreased (Fig. 1D). These data suggested that  $\beta$ -HPV E6 increases TEAD activity,  
325 so we used a TEAD-responsive luciferase promoter (57).  $\beta$ -HPV 8E6 caused a slight, but  
326 significant increase in luciferase, consistent with an ability to elevate TEAD promoter activity  
327 (Fig. 1E). As a functional readout of HP activation, we defined cell proliferation rates. Compared  
328 to vector control HFKs,  $\beta$ -HPV 8E6 increased growth in a p300-dependent manner, over a 5-day  
329 period (Fig. 1F).

330

### 331 **$\beta$ -HPV 8E6 increases the tolerance of failed cytokinesis in a p300-dependent manner.**

332 H2CB blocks cytokinesis via inhibiting actin polymerization, inducing tetraploidy. This activates  
333 the HP through LATS phosphorylation (32). Since we found decreased p300 expression  
334 correlated with enhanced TEAD activity, we hypothesized that  $\beta$ -HPV 8E6 hindered the HP's  
335 upstream protein's response to unsuccessful division after mitosis by binding and destabilizing  
336 p300 (Fig. 1). Our first step towards testing this hypothesis was to characterize H2CB activity in  
337 human osteosarcoma-derived U2OS and HFK cells expressing vector control,  $\beta$ -HPV 8E6, or  $\beta$ -  
338 HPV  $\Delta$ 8 E6. Binucleation was visualized by brightfield microscopy (Fig. 2A and 2B). H2CB  
339 universally increased the frequency of cells with more than one nucleus. Overall, there was an  
340 8.5-fold increase in U2OS cells ( $8.6\% \pm 6.7\%$  versus  $72.7\% \pm 11.7\%$ ,  $n=3$ ,  $P < 0.05$ ) and a 7.45-  
341 fold increase in HFK cell lines ( $7.4\% \pm 1.4\%$  versus  $55.3\% \pm 5.0\%$ ,  $n=3$ ,  $P < 0.05$ ) (Fig. 2C and  
342 2D). There was no statistical difference in H2CB-induced failed cytokinesis among the cell lines.  
343 Next, we began defining the cellular response to endoreplication without proper separation.  
344 U2OS cells were seeded at equal density and tracked for five days after H2CB treatment. As  
345 expected, inhibiting cell division was toxic with only fractions of the starting population of  
346 vector control cells remaining at the end of our time course ( $46.1\% \pm 5.6\%$  of the cells initially  
347 seeded).  $\beta$ -HPV 8E6 significantly reduced H2CB's deleterious effects ( $79.7\% \pm 12.8\%$  of the  
348 original population) (Fig. 2E).  $\beta$ -HPV  $\Delta$ 8E6 behaved indistinguishably from wildtype cells  
349 consistent with a p300-dependent mechanism of action ( $56.9\% \pm 7.6\%$  of the starting population)

350 (Fig. 2E). A similar trend was seen in HFKs expressing vector control,  $\beta$ -HPV 8, or  $\Delta$ 8E6,  
351 where  $\beta$ -HPV 8E6 expressing cells had reduced cell death when treated with H2CB over the  
352 course of 5 days (Fig. 2F). Using Ki-67 as a proliferation marker (58), we found that despite  
353 allowing more cells to survive H2CB,  $\beta$ -HPV 8E6 did not promote growth (Fig. 2G).

354

### 355 **$\beta$ -HPV 8E6 attenuates p53 accumulation induced by failed cytokinesis by inhibiting** 356 **pLATS activation.**

357 We previously reported that  $\beta$ -HPV 8E6 attenuated p53 stabilization after spontaneous  
358 binucleation (25). We used immunofluorescence microscopy and immunoblotting to confirm that  
359 this phenotype was maintained in cells exposed to H2CB.  $\beta$ -HPV 8E6 prevented the increase in  
360 p53-staining seen in vector control cells grown with H2CB (Fig. 3A and 3B). Consistent with  
361 past observations, the frequency of p53 staining and binucleation were equivalent in vector  
362 control ( $59.5\% \pm 4.3\%$  vs.  $51.35\% \pm 1.4$ ) (Fig. 2C and 3B). Validating the immunofluorescence  
363 data, immunoblot analysis confirmed that  $\beta$ -HPV 8E6 expressing cells limited p53 accrual when  
364 binucleated (Fig. 3C). Supporting a p300-dependent mechanism,  $\beta$ -HPV  $\Delta$ 8E6 did not suppress  
365 p53 induction (Fig. 3A-D). Interestingly, we did not see the increase in PI-positive cells after  
366 H2CB treatment that we had anticipated (Fig. 3E).

367

368 LATS activation is necessary for p53 to accumulate in tetraploid cells (32). To determine if  $\beta$ -  
369 HPV 8E6 reduced p53 accumulation by attenuating LATS phosphorylation, we induced failed  
370 cytokinesis and detected pLATS. Vector control cells showed a sharp increase in phosphorylated  
371 LATS (pLATS) relative to total LATS (Fig. 3F). Only total LATS levels increased when  $\beta$ -HPV  
372 8E6 was expressed (Fig. 3D). The induction of LATS phosphorylation in  $\beta$ -HPV  $\Delta$ 8E6 HFKs  
373 resembled the response in control cells, consistent with a p300-dependent mechanism (Fig. 3F).

374

375 A branch point in the HP occurs with LATS activation, which stabilizes p53 and phosphorylates  
376 YAP. This sequesters YAP in the cytoplasm preventing it from promoting transcription of pro-  
377 proliferative TEAD-responsive genes (57, 59, 60). To understand the breadth of  $\beta$ -HPV 8E6's  
378 HP dysregulation, we examined YAP sequestration by immunofluorescence microscopy. YAP  
379 translocated from the nucleus to cytoplasm in binucleated vector control HFKs (Fig. 3G-H).  
380 Neither  $\beta$ -HPV 8E6 nor  $\beta$ -HPV  $\Delta$ 8E6 changed this. Since YAP is a TEAD co-transcriptional  
381 activator, an increase in cytoplasmic YAP should result in a drop in TEAD activity (61).  
382 Utilizing the TEAD-reporter assay from Fig. 1E, we found that TEAD-driven transcription was  
383 reduced by H2CB-induced binucleation equally among the cell lines (Fig. 3I). While H2CB  
384 treatment significantly increased expression of STK4/MST1 and YAP in vector control HFKs,  
385 LATS expression remained constant.  $\beta$ -HPV 8E6 did not alter these changes (Fig. 3J).  
386 Consistent with specific inhibition of LATS activation,  $\beta$ -HPV 8E6 did not change the  
387 abundance of the other HP proteins (Supplemental Fig. 1A).

388

### 389 **$\beta$ -HPV 8E6 limits apoptosis in cells recovering from failed cytokinesis.**

390 Elevated p53 levels induce apoptosis in cells that do not divide after mitosis (32, 62).  $\beta$ -HPV  
391 8E6's ability to reduce H2CB toxicity and diminish p53 accumulation, suggests that it limits

392 apoptosis (Fig. 2E-F and 3A-D). However, we did not see increased apoptosis in any of the cells  
393 grown in H2CB for 24 hours (Fig. 3D). We hypothesized that apoptosis plays a larger role in  
394 rebounding from aberrant cytokinesis. To test this, we observed cells after H2CB was removed.  
395 There were no significant changes in binucleation frequency in vector control HFKs. However,  
396  $\beta$ -HPV 8E6 caused a significant decrease in supernumerary nuclei frequency ( $59.5\% \pm 1.0\%$  vs  
397  $36.3\% \pm 1.3\%$ ) (Fig. 4A).  $\beta$ -HPV  $\Delta$ 8E6 HFKs remain binucleated like vector control cells. (Fig.  
398 4A). Qualitative observations indicated that LXS<sub>N</sub> HFKs were dying and or becoming  
399 senescent. In contrast,  $\beta$ -HPV 8E6 expression allowed cells to undergo another round of  
400 replication, after which they frequently became mononucleated and heavily vacuolated  
401 (Supplementary Fig. 1B).

402  
403 To determine if  $\beta$ -HPV 8E6 retained its ability to suppress LATS, we observed cells when H2CB  
404 was removed. Immunoblots demonstrated that  $\beta$ -HPV 8E6 continued to attenuate the normal  
405 LATS phosphorylation (Fig. 4B). Similarly, immunofluorescence microscopy found  $\beta$ -HPV 8E6  
406 decreased both the frequency and intensity of p53 staining (Fig. 4C-E). There was a notable  
407 similarity between the frequency of p53 staining and binucleation as cells recovered (Fig. 4A, D-  
408 E). As we predicted, apoptosis was a typical response to H2CB removal that paralleled both p53  
409 induction and binucleation (Fig. 4A and E-F).  $\beta$ -HPV 8E6, but not  $\beta$ -HPV  $\Delta$ 8E6, decreased  
410 apoptosis after H2CB (Fig. 4F). Thus,  $\beta$ -HPV 8E6's attenuation of p53 accumulation minimized  
411 cell death in response to abortive cytokinesis.

412  
413  **$\beta$ -HPV 8E6 increases senescence during resolution of failed cytokinesis.** Despite avoiding  
414 apoptosis,  $\beta$ -HPV 8E6 did not completely absolve cells from the consequence of failed  
415 cytokinesis. Cell morphology, stifled proliferation, and reduced apoptosis led us to suspect that  
416  $\beta$ -HPV 8E6 increased senescence (63, 64). We used Ki67 staining to define proliferation.  $\beta$ -HPV  
417 8E6 had markedly lower Ki67 intensity during and after H2CB treatment (Fig. 5A and 5B  $572.0$   
418  $\pm 183.6$  and  $699.1 \pm 278.6$  respectively). We used senescence-associated  $\beta$ -Galactosidase (SA  $\beta$ -  
419 Gal) activity as a marker of senescent cells (65).  $\beta$ -HPV 8E6 significantly increased the  
420 frequency of SA  $\beta$ -Gal staining after H2CB was removed ( $52.0\% \pm 7.0\%$  vs  $78.5\% \pm 6.8\%$ )  
421 (Fig. 5C-D). Immunofluorescence microscopy and subcellular fractionation show that post-  
422 H2CB, cytoplasmic YAP sequestration was analogous among our cell lines, meaning this branch  
423 of the HP remained in tacked, despite muted the LATS phosphorylation caused by  $\beta$ -HPV 8E6  
424 (Fig. 5E-5G). These data are consistent with  $\beta$ -HPV 8E6 allowing cells to escape apoptosis only  
425 to "get caught" by senescence.

426  
427 ***TERT* allows cells to bypass senescence and recover after H2CB-induced failed cytokinesis.**  
428 Curious as to whether mutations common in cSCC were associated with bypassing senescence,  
429 we queried sequencing data from 68 cutaneous cSCC samples (38, 39). First, we identified  
430 mutated genes in cSCCs and ranked them by their frequency. The top 10% of these genes were  
431 analyzed using the web-based gene ontology software, PANTHER (Supplementary Data 2) (42,  
432 43, 66) Proliferation and senescence were identified as biological processes commonly altered in  
433 cSCCs and expected to limit senescence. Of the relevant genetic changes, *TERT* activation was

434 selected because it was independently verified to be common in cSCCs (67–70). We used  
435 previously characterized keratinocytes immortalized by telomerase activation and transduced  
436 with HA-tagged  $\beta$ -HPV 8 E6 or vector control (TERT-HFK LXSXN and TERT-HFK  $\beta$ -HPV 8E6)  
437 (71, 72).

438  
439 To determine if  $\beta$ -HPV 8E6 and *TERT* activation synergize, we exposed cells to H2CB for 3  
440 days and monitored their recovery over time after the drug was removed. Although  $\beta$ -HPV 8E6  
441 could mitigate some of H2CB's short term toxicity, we were never able to get HFKs to grow for  
442 more than a few passages after H2CB. In contrast, *TERT* activation alone and in combination  
443 with  $\beta$ -HPV 8E6 allowed them to sustain growth after 3-days of H2CB treatment (Fig. 6B).  
444 Binucleation was increased by *TERT* activation with and without  $\beta$ -HPV E6 ( $51.4\% \pm 3.5\%$  vs  
445  $87.9\% \pm 2.9\%$ ), (Fig. 6C). SA  $\beta$ -Gal staining was increased in all *TERT*-HFKs exposed to H2CB  
446 ( $19.6\% \pm 3.6\%$  vs  $63.4\% \pm 3.8\%$ ), (Fig. 6D). Of the senescent cells, the fraction that had  $\geq 2$   
447 nuclei increased in *TERT*-HFKs ( $19.2\% \pm 0.9\%$  vs  $88.8\% \pm 3.7\%$ ), (Fig. 6E).

448  
449  **$\beta$ -HPV 8E6 and *TERT* activation synergize, allowing genetically unstable cells to**  
450 **proliferate.**

451 Although telomerase activation alone allowed cells to recover from failed cytokinesis, we  
452 wanted to determine if this ability could be augmented by  $\beta$ -HPV 8E6 after extended H2CB  
453 treatment. To this end, we grew cells in H2CB for an additional 3 days. The longer exposure  
454 resulted in a notably lower *TERT*-HFK LXSXN cell survival (Fig. 7A). In contrast, *TERT*-HFK  $\beta$ -  
455 HPV 8E6 cells rebounded every time (Fig. 7A). When both cell lines lived,  $\beta$ -HPV 8E6  
456 expression made them resume normal growth rates sooner (Fig. 7B). We hypothesized that  
457 surviving had high costs regarding genome stability and tested this idea by examining changes in  
458 ploidy (Fig. 7C). After H2CB exposure, polyploidy and aneuploidy dominated, with most cells  
459 having  $\sim 96$  chromosomes (Fig. 7D-E). Chromosome abnormalities were further exacerbated by  
460  $\beta$ -HPV 8E6 with and without H2CB (Fig. 7D-E).

## 461 DISCUSSION:

462 The proliferation of tetraploid cells stemming from mitotic failures threatens genomic stability  
463 and enable tumor development by causing aneuploidy (47, 73). The HP minimizes this risk by  
464 halting growth and initiating apoptosis (32, 74). Mitotic skin cells face a 10% risk of becoming  
465 tetraploid, thus, the HP is particularly important for maintaining their genomic stability (25, 31).  
466  $\beta$ -HPV 8E6 disrupts multiple cell signaling pathways necessary for DNA repair and regulating  
467 differentiation. Much of its ability to disrupt DNA repair has been linked to its destabilization of  
468 p300. We show that the reduction of p300 also hinders the HP's activation. Adding to the  
469 mechanisms known to promote cell growth, reduced HP activity is accompanied by slightly  
470 increased proliferation and elevated pro-proliferative TEAD activity. However,  $\beta$ -HPV 8E6 also  
471 allows binucleated cells to avoid apoptosis. More specifically,  $\beta$ -HPV E6 attenuates LATS  
472 phosphorylation leading to a blunted p53 response. While this temporarily promotes  
473 proliferation, senescence acts as a failsafe mechanism preventing extensive growth of these  
474 damaged cells. This checkpoint can be bypassed if  $\beta$ -HPV 8E6 is expressed in cells immortalized

475 by telomerase activation. Consistent with dysregulation of the cell's response to failed  
476 cytokinesis,  $\beta$ -HPV 8E6 increased chromosomal instability (i.e., aneuploidy).

477  
478 The strongest criticism of the idea that  $\beta$ -HPV infections contribute to cancer, is the fact that  
479 most people get infected but significantly fewer people get cSCCs. We show that  $\beta$ -HPV 8E6's  
480 ability to cause genome instability is enhanced by telomerase activation, suggesting that  $\beta$ -HPV  
481 infections may be more tumorigenic in certain groups of people. The same principle would apply  
482 within an individual as well. If such an "at risk" group(s) exists, mutations in the host cell's  
483 genome at the time of infection would matter as much as whether a viral infection occurred. This  
484 could explain the current struggles of epidemiologists to link  $\beta$ -HPVs to skin cancers, as existing  
485 observations have largely focused on the presence/absence of  $\beta$ -HPV. Relevant to the work  
486 presented here, telomerase activating mutations are common during cSCC development (68, 69).

487  
488 We also extend the long history of using viral oncogenes to learn about cell biology. Our data  
489 links p300 to the HP and TEAD responsive gene expression. We also confirm that LATS is  
490 activated in binucleated cells. Moreover, we show that senescence is triggered in binucleated  
491 cells that bypass apoptosis and that telomerase activity is a limiting factor in the propagation of  
492 binucleated cells. Our observation that cells sense and respond to the disruption of actin  
493 polymerization before it culminates in a binucleated cell is novel. Finally, we show that the  
494 deleterious effects of failed cytokinesis increase when resolution of the ensuing polyploidy is  
495 delayed.

496  
497 Others have suggested that  $\beta$ -HPV influences the HP, most notably by binding PTPN14 (75).  
498 Genus  $\alpha$  HPV oncogenes also dysregulate the pathway (76, 77). Our data adds another link  
499 between HPVs and the HP. The shared manipulation of the HP suggests HPVs gain an  
500 evolutionary advantage by abrogating the signaling cascade. The "motivation" could stem from  
501 the modest growth advantage that we report; however, this weak phenotype seems unlikely to  
502 drive convergent evolution toward HP dysregulation. Given the HP's role in immunity, it is more  
503 enticing to speculate that targeting the HP helps HPVs avoid an immune response (78, 79).  
504 Indeed, an MST1 deficiency leads to more prevalent  $\beta$ -HPV infections (80). Since the HP was  
505 only discovered 14 years ago (81), there could be other currently unknown advantageous to be  
506 gained by disrupting the pathway.

## 507 Acknowledgements:

508  
509 We thank and acknowledge the KSU-CVM Confocal Core, especially Joel Sanneman for  
510 assisting with our immunofluorescence imaging. Michael Underbrink for providing the *hTERT*-  
511 immortalized HFKs. Stefano Piccolo for gifting the 8xGTIIC plasmid. Also, we thank members  
512 of the Zhilong Yang lab for their support.

513  
514 This work was supported by Department of Defense CMDRP PRCRP CA160224 (NW) and  
515 made possible through generous support from the Les Clow family and the Johnson Cancer  
516 Research Center at Kansas State University.

517 **Bibliography:**

518

519 1. Van Doorslaer K, Li Z, Xirasagar S, Maes P, Kaminsky D, Liou D, Sun Q, Kaur R, Huyen

520 Y, McBride AA. 2017. The Papillomavirus Episteme: a major update to the papillomavirus

521 sequence database. *Nucleic Acids Res* 45:D499–D506.

522 2. zur Hausen H. 2002. Papillomaviruses and cancer: from basic studies to clinical

523 application. *Nat Rev Cancer* 2:342–350.

524 3. Cogliano V, Baan R, Straif K, Grosse Y, Secretan B, El Ghissassi F, WHO International

525 Agency for Research on Cancer. 2005. Carcinogenicity of human papillomaviruses. *Lancet*

526 *Oncol* 6:204.

527 4. Orth G, Jablonska S, Favre M, Croissant O, Jarzabek-Chorzelska M, Rzeska G. 1978.

528 Characterization of two types of human papillomaviruses in lesions of epidermodysplasia

529 verruciformis. *Proc Natl Acad Sci U S A* 75:1537–1541.

530 5. Purdie KJ, Suretheran T, Sterling JC, Bell L, McGregor JM, Proby CM, Harwood CA,

531 Breuer J. 2005. Human papillomavirus gene expression in cutaneous squamous cell

532 carcinomas from immunosuppressed and immunocompetent individuals. *J Invest Dermatol*

533 125:98–107.

534 6. Harwood CA, McGregor JM, Proby CM, Breuer J. 1999. Human papillomavirus and the

535 development of non-melanoma skin cancer. *J Clin Pathol* 52:249–253.

536 7. Chahoud J, Semaan A, Chen Y, Cao M, Rieber AG, Rady P, Tyring SK. 2016. Association

537 Between  $\beta$ -Genus Human Papillomavirus and Cutaneous Squamous Cell Carcinoma in

538 Immunocompetent Individuals—A Meta-analysis. *JAMA Dermatol* 152:1354–1364.

- 539 8. Masini C, Fuchs PG, Gabrielli F, Stark S, Sera F, Ploner M, Melchi CF, Primavera G,  
540 Pirchio G, Picconi O, Petasecca P, Cattaruzza MS, Pfister HJ, Abeni D. 2003. Evidence for  
541 the association of human papillomavirus infection and cutaneous squamous cell carcinoma  
542 in immunocompetent individuals. *Arch Dermatol* 139:890–894.
- 543 9. Chitsazzadeh V, Coarfa C, Drummond JA, Nguyen T, Joseph A, Chilukuri S, Charpiot E,  
544 Adelmann CH, Ching G, Nguyen TN, Nicholas C, Thomas VD, Migden M, MacFarlane D,  
545 Thompson E, Shen J, Takata Y, McNiece K, Polansky MA, Abbas HA, Rajapakshe K,  
546 Gower A, Spira A, Covington KR, Xiao W, Gunaratne P, Pickering C, Frederick M, Myers  
547 JN, Shen L, Yao H, Su X, Rapini RP, Wheeler DA, Hawk ET, Flores ER, Tsai KY. 2016.  
548 Cross-species identification of genomic drivers of squamous cell carcinoma development  
549 across preneoplastic intermediates. *Nat Commun* 7.
- 550 10. Weissenborn SJ, Nindl I, Purdie K, Harwood C, Proby C, Breuer J, Majewski S, Pfister H,  
551 Wieland U. 2005. Human papillomavirus-DNA loads in actinic keratoses exceed those in  
552 non-melanoma skin cancers. *J Invest Dermatol* 125:93–97.
- 553 11. Howley PM, Pfister HJ. 2015. Beta Genus Papillomaviruses and Skin Cancer. *Virology*  
554 0:290–296.
- 555 12. Weissenborn SJ, De Koning MNC, Wieland U, Quint WGV, Pfister HJ. 2009. Intrafamilial  
556 transmission and family-specific spectra of cutaneous betapapillomaviruses. *J Virol*  
557 83:811–816.
- 558 13. Akgül B, Cooke JC, Storey A. 2006. HPV-associated skin disease. *J Pathol* 208:165–175.

- 559 14. Aldabagh B, Angeles JGC, Cardones AR, Arron ST. 2013. Cutaneous Squamous Cell  
560 Carcinoma and Human Papillomavirus: Is There An Association? *Dermatol Surg Off Publ*  
561 *Am Soc Dermatol Surg Al* 39:1–23.
- 562 15. Rosen T, Lebwohl MG. 2013. Prevalence and awareness of actinic keratosis: barriers and  
563 opportunities. *J Am Acad Dermatol* 68:S2-9.
- 564 16. Warino L, Tusa M, Camacho F, Teuschler H, Fleischer AB, Feldman SR. 2006. Frequency  
565 and cost of actinic keratosis treatment. *Dermatol Surg Off Publ Am Soc Dermatol Surg Al*  
566 32:1045–1049.
- 567 17. Actinic keratoses: Natural history and risk of malignant transformation in the Veterans  
568 Affairs Topical Tretinoin Chemoprevention Trial. - PubMed - NCBI.
- 569 18. Marcuzzi GP, Hufbauer M, Kasper HU, Weißenborn SJ, Smola S, Pfister H. 2009.  
570 Spontaneous tumour development in human papillomavirus type 8 E6 transgenic mice and  
571 rapid induction by UV-light exposure and wounding. *J Gen Virol* 90:2855–2864.
- 572 19. Schaper ID, Marcuzzi GP, Weissenborn SJ, Kasper HU, Dries V, Smyth N, Fuchs P, Pfister  
573 H. 2005. Development of Skin Tumors in Mice Transgenic for Early Genes of Human  
574 Papillomavirus Type 8. *Cancer Res* 65:1394–1400.
- 575 20. Meyers JM, Uberoi A, Grace M, Lambert PF, Munger K. 2017. Cutaneous HPV8 and  
576 MmuPV1 E6 Proteins Target the NOTCH and TGF- $\beta$  Tumor Suppressors to Inhibit  
577 Differentiation and Sustain Keratinocyte Proliferation. *PLoS Pathog* 13.



- 578 21. Underbrink MP, Howie HL, Bedard KM, Koop JI, Galloway DA. 2008. E6 proteins from  
579 multiple human betapapillomavirus types degrade Bak and protect keratinocytes from  
580 apoptosis after UVB irradiation. *J Virol* 82:10408–10417.
- 581 22. Wallace NA, Robinson K, Howie HL, Galloway DA. 2012. HPV 5 and 8 E6 Abrogate ATR  
582 Activity Resulting in Increased Persistence of UVB Induced DNA Damage. *PLoS Pathog* 8.
- 583 23. Viarisio D, Mueller-Decker K, Kloz U, Aengeneyndt B, Kopp-Schneider A, Gröne H-J,  
584 Gheit T, Flechtenmacher C, Gissmann L, Tommasino M. 2011. E6 and E7 from beta  
585 HPV38 cooperate with ultraviolet light in the development of actinic keratosis-like lesions  
586 and squamous cell carcinoma in mice. *PLoS Pathog* 7:e1002125.
- 587 24. Deshmukh J, Pofahl R, Pfister H, Haase I. 2016. Deletion of epidermal Rac1 inhibits HPV-  
588 8 induced skin papilloma formation and facilitates HPV-8- and UV-light induced skin  
589 carcinogenesis. *Oncotarget* 7:57841–57850.
- 590 25. Wallace NA, Robinson K, Galloway DA. 2014. Beta Human Papillomavirus E6 Expression  
591 Inhibits Stabilization of p53 and Increases Tolerance of Genomic Instability. *J Virol*  
592 88:6112–6127.
- 593 26. Wallace NA, Gasior SL, Faber ZJ, Howie HL, Deininger PL, Galloway DA. 2013. HPV 5  
594 and 8 E6 expression reduces ATM protein levels and attenuates LINE-1 retrotransposition.  
595 *Virology* 443:69–79.
- 596 27. Howie HL, Koop JI, Weese J, Robinson K, Wipf G, Kim L, Galloway DA. 2011. Beta-  
597 HPV 5 and 8 E6 Promote p300 Degradation by Blocking AKT/p300 Association. *PLoS*  
598 *Pathog* 7.

- 599 28. Muench P, Probst S, Schuetz J, Leiprecht N, Busch M, Wesselborg S, Stubenrauch F, Iftner  
600 T. 2010. Cutaneous Papillomavirus E6 Proteins Must Interact with p300 and Block p53-  
601 Mediated Apoptosis for Cellular Immortalization and Tumorigenesis. *Cancer Res* 70:6913–  
602 6924.
- 603 29. Dancy BM, Cole PA. 2015. Protein Lysine Acetylation by p300/CBP. *Chem Rev*  
604 115:2419–2452.
- 605 30. Chan HM, Thangue NBL. 2001. p300/CBP proteins: HATs for transcriptional bridges and  
606 scaffolds. *J Cell Sci* 114:2363–2373.
- 607 31. Soto M, García-Santisteban I, Krenning L, Medema RH, Raaijmakers JA. 2018.  
608 Chromosomes trapped in micronuclei are liable to segregation errors. *J Cell Sci* 131.
- 609 32. Ganem NJ, Cornils H, Chiu S-Y, O'Rourke KP, Arnaud J, Yimlamai D, Théry M, Camargo  
610 FD, Pellman D. 2014. Cytokinesis Failure Triggers Hippo Tumor Suppressor Pathway  
611 Activation. *Cell* 158:833–848.
- 612 33. Stukenberg PT. 2004. Triggering p53 after cytokinesis failure. *J Cell Biol* 165:607–608.
- 613 34. Shinmura K, Bennett RA, Tarapore P, Fukasawa K. 2007. Direct evidence for the role of  
614 centrosomally localized p53 in the regulation of centrosome duplication. *Oncogene*  
615 26:2939–2944.
- 616 35. Barretina J, Caponigro G, Stransky N, Venkatesan K, Margolin AA, Kim S, Wilson CJ,  
617 Lehár J, Kryukov GV, Sonkin D, Reddy A, Liu M, Murray L, Berger MF, Monahan JE,  
618 Morais P, Meltzer J, Korejwa A, Jané-Valbuena J, Mapa FA, Thibault J, Bric-Furlong E,

- 619 Raman P, Shipway A, Engels IH, Cheng J, Yu GK, Yu J, Aspesi P, de Silva M, Jagtap K,  
620 Jones MD, Wang L, Hatton C, Palessandolo E, Gupta S, Mahan S, Sougnez C, Onofrio RC,  
621 Liefeld T, MacConaill L, Winckler W, Reich M, Li N, Mesirov JP, Gabriel SB, Getz G,  
622 Ardlie K, Chan V, Myer VE, Weber BL, Porter J, Warmuth M, Finan P, Harris JL,  
623 Meyerson M, Golub TR, Morrissey MP, Sellers WR, Schlegel R, Garraway LA. 2012. The  
624 Cancer Cell Line Encyclopedia enables predictive modelling of anticancer drug sensitivity.  
625 *Nature* 483:603–607.
- 626 36. Gao J, Aksoy BA, Dogrusoz U, Dresdner G, Gross B, Sumer SO, Sun Y, Jacobsen A, Sinha  
627 R, Larsson E, Cerami E, Sander C, Schultz N. 2013. Integrative Analysis of Complex  
628 Cancer Genomics and Clinical Profiles Using the cBioPortal. *Sci Signal* 6:p11.
- 629 37. Cerami E, Gao J, Dogrusoz U, Gross BE, Sumer SO, Aksoy BA, Jacobsen A, Byrne CJ,  
630 Heuer ML, Larsson E, Antipin Y, Reva B, Goldberg AP, Sander C, Schultz N. 2012. The  
631 cBio Cancer Genomics Portal: An Open Platform for Exploring Multidimensional Cancer  
632 Genomics Data. *Cancer Discov* 2:401–404.
- 633 38. Li YY, Hanna GJ, Laga AC, Haddad RI, Lorch JH, Hammerman PS. 2015. Genomic  
634 analysis of metastatic cutaneous squamous cell carcinoma. *Clin Cancer Res Off J Am*  
635 *Assoc Cancer Res* 21:1447–1456.
- 636 39. Pickering CR, Zhou JH, Lee JJ, Drummond JA, Peng SA, Saade RE, Tsai KY, Curry JL,  
637 Tetzlaff MT, Lai SY, Yu J, Muzny DM, Doddapaneni H, Shinbrot E, Covington KR, Zhang  
638 J, Seth S, Caulin C, Clayman GL, El-Naggar AK, Gibbs RA, Weber RS, Myers JN,  
639 Wheeler DA, Frederick MJ. 2014. Mutational landscape of aggressive cutaneous squamous  
640 cell carcinoma. *Clin Cancer Res Off J Am Assoc Cancer Res* 20:6582–6592.

- 641 40. Eden E, Navon R, Steinfeld I, Lipson D, Yakhini Z. 2009. GOrilla: a tool for discovery and  
642 visualization of enriched GO terms in ranked gene lists. *BMC Bioinformatics* 10:48.
- 643 41. Eden E, Lipson D, Yogev S, Yakhini Z. 2007. Discovering Motifs in Ranked Lists of DNA  
644 Sequences. *PLOS Comput Biol* 3:e39.
- 645 42. Ashburner M, Ball CA, Blake JA, Botstein D, Butler H, Cherry JM, Davis AP, Dolinski K,  
646 Dwight SS, Eppig JT, Harris MA, Hill DP, Issel-Tarver L, Kasarskis A, Lewis S, Matese  
647 JC, Richardson JE, Ringwald M, Rubin GM, Sherlock G. 2000. Gene Ontology: tool for the  
648 unification of biology. *Nat Genet* 25:25–29.
- 649 43. 2019. The Gene Ontology Resource: 20 years and still GOing strong. *Nucleic Acids Res*  
650 47:D330–D338.
- 651 44. Murthy V, Dacus D, Gamez M, Hu C, Wendel SO, Snow J, Kahn A, Walterhouse SH,  
652 Wallace NA. 2018. Characterizing DNA Repair Processes at Transient and Long-lasting  
653 Double-strand DNA Breaks by Immunofluorescence Microscopy. *JoVE J Vis Exp* e57653.
- 654 45. Howe B, Umrigar A, Tsien F. 2014. Chromosome Preparation From Cultured Cells. *J Vis*  
655 *Exp JoVE*.
- 656 46. Wallace NA, Robinson K, Howie HL, Galloway DA. 2015.  $\beta$ -HPV 5 and 8 E6 Disrupt  
657 Homology Dependent Double Strand Break Repair by Attenuating BRCA1 and BRCA2  
658 Expression and Foci Formation. *PLoS Pathog* 11.
- 659 47. Ganem NJ, Storchova Z, Pellman D. 2007. Tetraploidy, aneuploidy and cancer. *Curr Opin*  
660 *Genet Dev* 17:157–162.

- 661 48. Sen S. 2000. Aneuploidy and cancer. *Curr Opin Oncol* 12:82–88.
- 662 49. Meyers JM, Spangle JM, Munger K. 2013. The Human Papillomavirus Type 8 E6 Protein  
663 Interferes with NOTCH Activation during Keratinocyte Differentiation. *J Virol* 87:4762–  
664 4767.
- 665 50. Cerami E, Gao J, Dogrusoz U, Gross BE, Sumer SO, Aksoy BA, Jacobsen A, Byrne CJ,  
666 Heuer ML, Larsson E, Antipin Y, Reva B, Goldberg AP, Sander C, Schultz N. 2012. The  
667 cBio Cancer Genomics Portal: An Open Platform for Exploring Multidimensional Cancer  
668 Genomics Data. *Cancer Discov* 2:401–404.
- 669 51. Gao J, Aksoy BA, Dogrusoz U, Dresdner G, Gross B, Sumer SO, Sun Y, Jacobsen A, Sinha  
670 R, Larsson E, Cerami E, Sander C, Schultz N. 2013. Integrative analysis of complex cancer  
671 genomics and clinical profiles using the cBioPortal. *Sci Signal* 6:pl1.
- 672 52. Eden E, Lipson D, Yogev S, Yakhini Z. 2007. Discovering Motifs in Ranked Lists of DNA  
673 Sequences. *PLOS Comput Biol* 3:e39.
- 674 53. Eden E, Navon R, Steinfeld I, Lipson D, Yakhini Z. 2009. GOrilla: a tool for discovery and  
675 visualization of enriched GO terms in ranked gene lists. *BMC Bioinformatics* 10:48.
- 676 54. Zhang L, Ren F, Zhang Q, Chen Y, Wang B, Jiang J. 2008. The TEAD/TEF family of  
677 transcription factor Scalloped mediates Hippo signaling in organ size control. *Dev Cell*  
678 14:377–387.

- 679 55. Zhao B, Ye X, Yu J, Li L, Li W, Li S, Yu J, Lin JD, Wang C-Y, Chinnaiyan AM, Lai Z-C,  
680 Guan K-L. 2008. TEAD mediates YAP-dependent gene induction and growth control.  
681 *Genes Dev* 22:1962–1971.
- 682 56. Müller-Schiffmann A, Beckmann J, Steger G. 2006. The E6 Protein of the Cutaneous  
683 Human Papillomavirus Type 8 Can Stimulate the Viral Early and Late Promoters by  
684 Distinct Mechanisms. *J Virol* 80:8718–8728.
- 685 57. Dupont S, Morsut L, Aragona M, Enzo E, Giulitti S, Cordenonsi M, Zanconato F, Le  
686 Digabel J, Forcato M, Bicciato S, Elvassore N, Piccolo S. 2011. Role of YAP/TAZ in  
687 mechanotransduction. *Nature* 474:179–183.
- 688 58. Scholzen T, Gerdes J. 2000. The Ki-67 protein: from the known and the unknown. *J Cell*  
689 *Physiol* 182:311–322.
- 690 59. Piccolo S, Dupont S, Cordenonsi M. 2014. The Biology of YAP/TAZ: Hippo Signaling and  
691 Beyond. *Physiol Rev* 94:1287–1312.
- 692 60. Johnson R, Halder G. 2014. The two faces of Hippo: targeting the Hippo pathway for  
693 regenerative medicine and cancer treatment. *Nat Rev Drug Discov* 13:63–79.
- 694 61. Bao Y, Nakagawa K, Yang Z, Ikeda M, Withanage K, Ishigami-Yuasa M, Okuno Y, Hata  
695 S, Nishina H, Hata Y. 2011. A cell-based assay to screen stimulators of the Hippo pathway  
696 reveals the inhibitory effect of dobutamine on the YAP-dependent gene transcription. *J*  
697 *Biochem (Tokyo)* 150:199–208.
- 698 62. Aylon Y, Oren M. 2011. p53: Guardian of ploidy. *Mol Oncol* 5:315–323.

- 699 63. Pawlowska E, Szczepanska J, Szatkowska M, Blasiak J. 2018. An Interplay between  
700 Senescence, Apoptosis and Autophagy in Glioblastoma Multiforme—Role in Pathogenesis  
701 and Therapeutic Perspective. *Int J Mol Sci* 19.
- 702 64. Childs BG, Baker DJ, Kirkland JL, Campisi J, van Deursen JM. 2014. Senescence and  
703 apoptosis: dueling or complementary cell fates? *EMBO Rep* 15:1139–1153.
- 704 65. Dimri GP, Lee X, Basile G, Acosta M, Scott G, Roskelley C, Medrano EE, Linskens M,  
705 Rubelj I, Pereira-Smith O. 1995. A biomarker that identifies senescent human cells in  
706 culture and in aging skin in vivo. *Proc Natl Acad Sci U S A* 92:9363–9367.
- 707 66. Mi H, Huang X, Muruganujan A, Tang H, Mills C, Kang D, Thomas PD. 2017. PANTHER  
708 version 11: expanded annotation data from Gene Ontology and Reactome pathways, and  
709 data analysis tool enhancements. *Nucleic Acids Res* 45:D183–D189.
- 710 67. Pópulo H, Boaventura P, Vinagre J, Batista R, Mendes A, Caldas R, Pardal J, Azevedo F,  
711 Honavar M, Guimarães I, Manuel Lopes J, Sobrinho-Simões M, Soares P. 2014. TERT  
712 Promoter Mutations in Skin Cancer: The Effects of Sun Exposure and X-Irradiation. *J*  
713 *Invest Dermatol* 134:2251–2257.
- 714 68. Griewank KG, Murali R, Schilling B, Schimming T, Möller I, Moll I, Schwamborn M,  
715 Sucker A, Zimmer L, Schadendorf D, Hillen U. 2013. TERT Promoter Mutations Are  
716 Frequent in Cutaneous Basal Cell Carcinoma and Squamous Cell Carcinoma. *PLoS ONE* 8.
- 717 69. Scott GA, Laughlin TS, Rothberg PG. 2014. Mutations of the *TERT* promoter are common  
718 in basal cell carcinoma and squamous cell carcinoma. *Mod Pathol* 27:516–523.

- 719 70. Cheng KA, Kurtis B, Babayeva S, Zhuge J, Tantchou I, Cai D, Lafaro RJ, Fallon JT, Zhong  
720 M. 2015. Heterogeneity of TERT promoter mutations status in squamous cell carcinomas of  
721 different anatomical sites. *Ann Diagn Pathol* 19:146–148.
- 722 71. Wang J, Dupuis C, Tying SK, Underbrink MP. 2016. Sterile  $\alpha$  Motif Domain Containing 9  
723 Is a Novel Cellular Interacting Partner to Low-Risk Type Human Papillomavirus E6  
724 Proteins. *PLoS ONE* 11.
- 725 72. Dickson MA, Hahn WC, Ino Y, Ronfard V, Wu JY, Weinberg RA, Louis DN, Li FP,  
726 Rheinwald JG. 2000. Human Keratinocytes That Express hTERT and Also Bypass a  
727 p16INK4a-Enforced Mechanism That Limits Life Span Become Immortal yet Retain  
728 Normal Growth and Differentiation Characteristics. *Mol Cell Biol* 20:1436–1447.
- 729 73. Davoli T, de Lange T. 2011. The causes and consequences of polyploidy in normal  
730 development and cancer. *Annu Rev Cell Dev Biol* 27:585–610.
- 731 74. Senovilla L, Vitale I, Martins I, Tailler M, Pailleret C, Michaud M, Galluzzi L, Adjemian S,  
732 Kepp O, Niso-Santano M, Shen S, Mariño G, Criollo A, Boilève A, Job B, Ladoire S,  
733 Ghiringhelli F, Sistigu A, Yamazaki T, Rello-Varona S, Locher C, Poirier-Colame V,  
734 Talbot M, Valent A, Berardinelli F, Antoccia A, Ciccocanti F, Fimia GM, Piacentini M,  
735 Fueyo A, Messina NL, Li M, Chan CJ, Sigl V, Pourcher G, Ruckentstuhl C, Carmona-  
736 Gutierrez D, Lazar V, Penninger JM, Madeo F, López-Otín C, Smyth MJ, Zitvogel L,  
737 Castedo M, Kroemer G. 2012. An immunosurveillance mechanism controls cancer cell  
738 ploidy. *Science* 337:1678–1684.



- 739 75. White EA, Kramer RE, Tan MJA, Hayes SD, Harper JW, Howley PM. 2012.  
740 Comprehensive Analysis of Host Cellular Interactions with Human Papillomavirus E6  
741 Proteins Identifies New E6 Binding Partners and Reflects Viral Diversity. *J Virol*  
742 86:13174–13186.
- 743 76. He C, Mao D, Hua G, Lv X, Chen X, Angeletti PC, Dong J, Remmenga SW, Rodabaugh  
744 KJ, Zhou J, Lambert PF, Yang P, Davis JS, Wang C. 2015. The Hippo/YAP pathway  
745 interacts with EGFR signaling and HPV oncoproteins to regulate cervical cancer  
746 progression. *EMBO Mol Med* 7:1426–1449.
- 747 77. Morgan E, Patterson M, Lee SY, Wasson C, Macdonald A. 2018. High-risk human  
748 papillomaviruses down-regulate expression of the Ste20 family kinase MST1 to inhibit the  
749 Hippo pathway and promote transformation.
- 750 78. Cheng J, Jing Y, Kang D, Yang L, Li J, Yu Z, Peng Z, Li X, Wei Y, Gong Q, Miron RJ,  
751 Zhang Y, Liu C. 2018. The Role of Mst1 in Lymphocyte Homeostasis and Function. *Front*  
752 *Immunol* 9.
- 753 79. Zhang Y, Zhang H, Zhao B. 2018. Hippo Signaling in the Immune System. *Trends*  
754 *Biochem Sci* 43:77–80.
- 755 80. Crequer A, Picard C, Patin E, D’Amico A, Abhyankar A, Munzer M, Debré M, Zhang S-Y,  
756 Saint-Basile G de, Fischer A, Abel L, Orth G, Casanova J-L, Jouanguy E. 2012. Inherited  
757 MST1 Deficiency Underlies Susceptibility to EV-HPV Infections. *PLOS ONE* 7:e44010.
- 758 81. Pan D. 2010. The Hippo Signaling Pathway in Development and Cancer. *Dev Cell* 19:491–  
759 505.

760

761

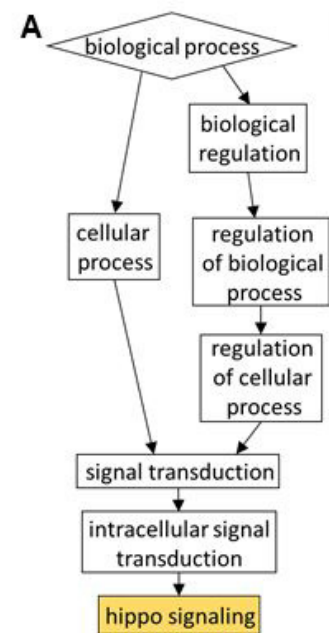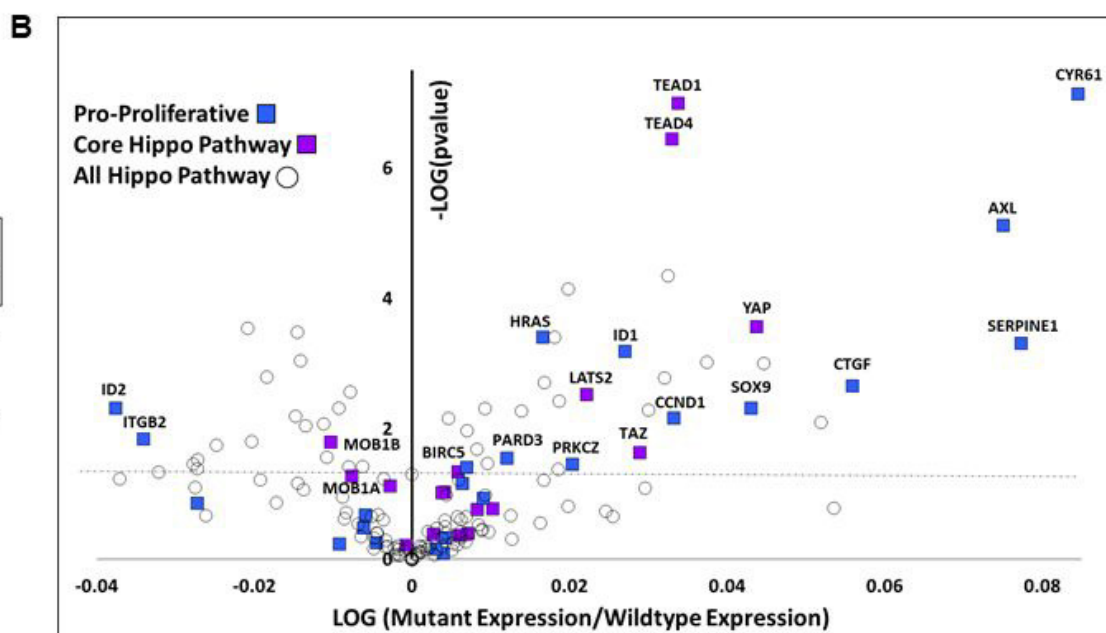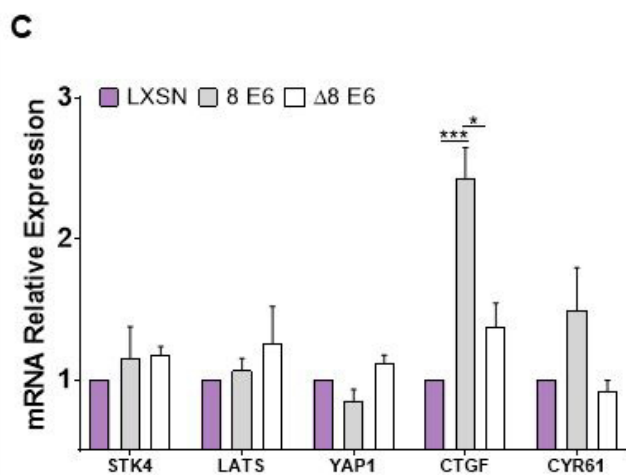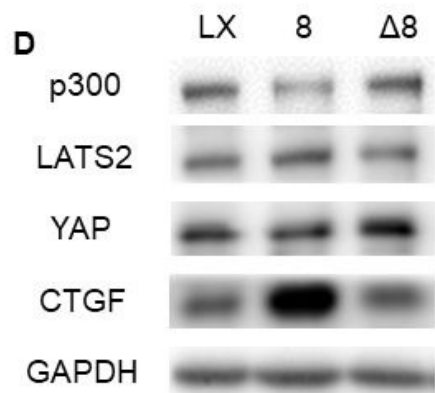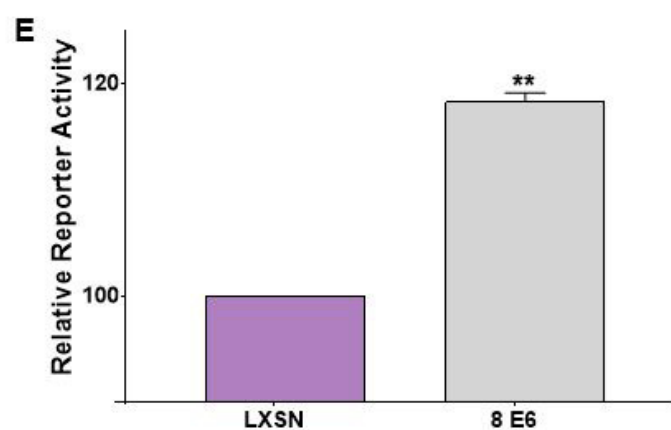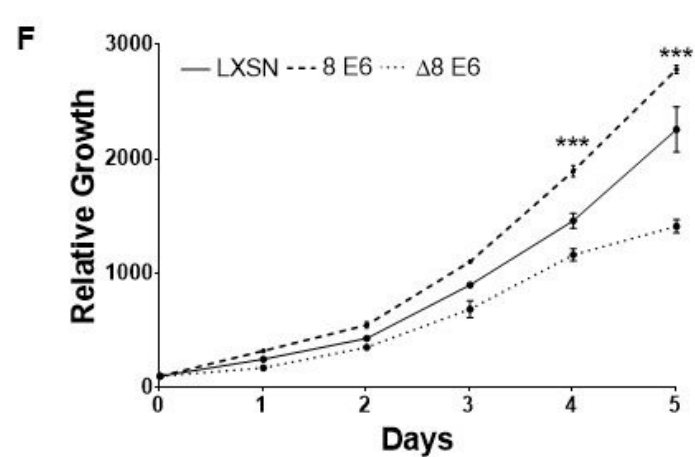

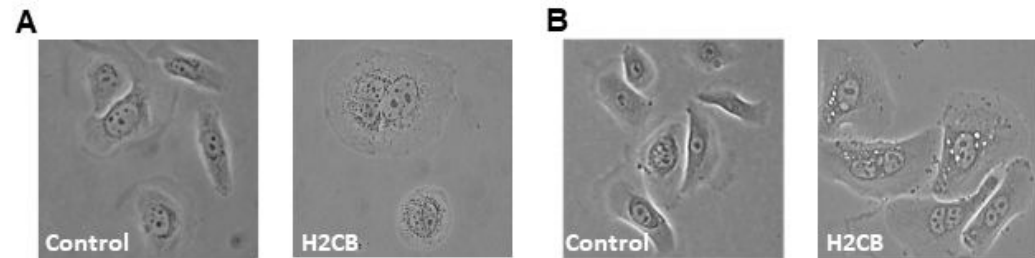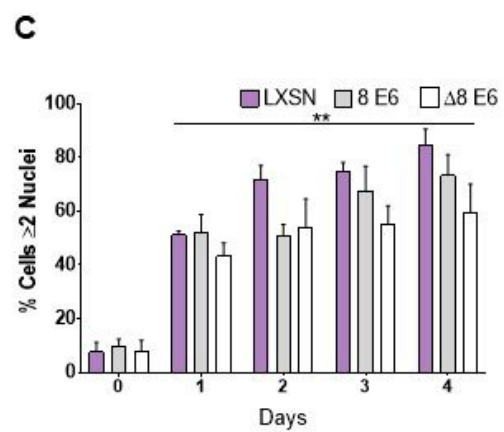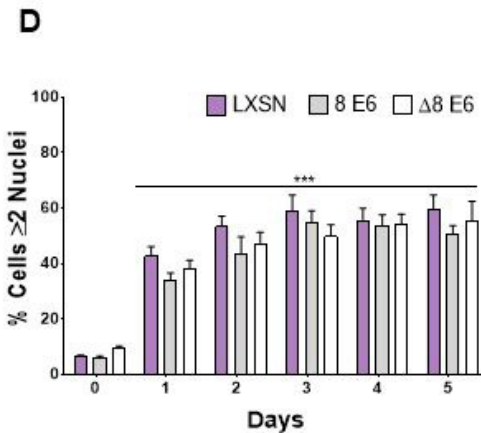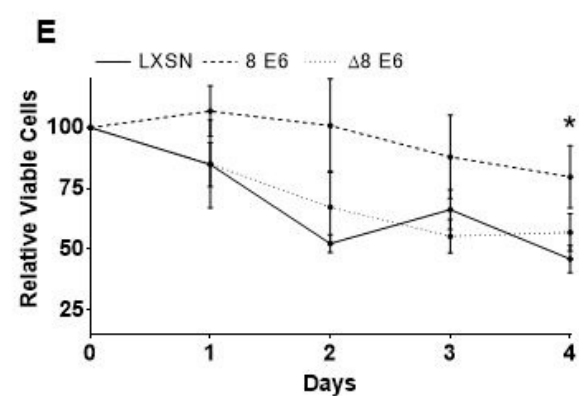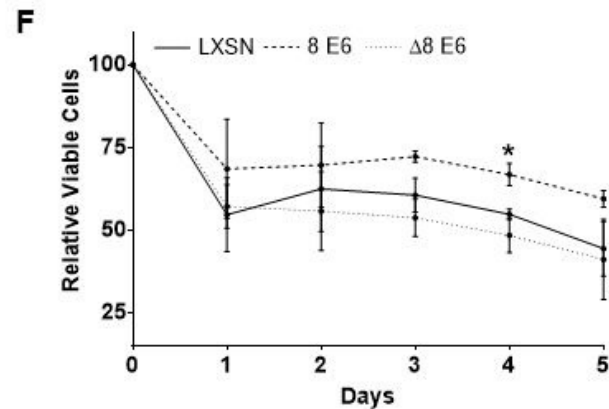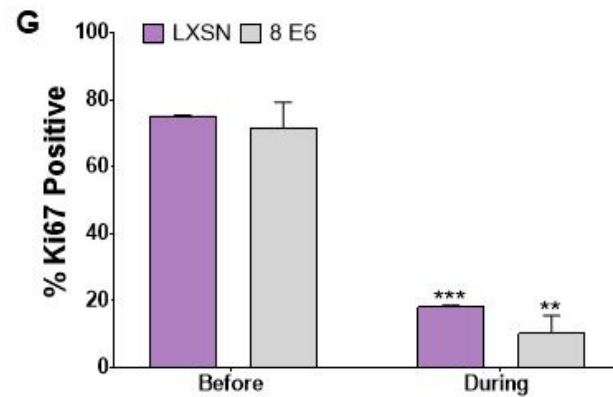

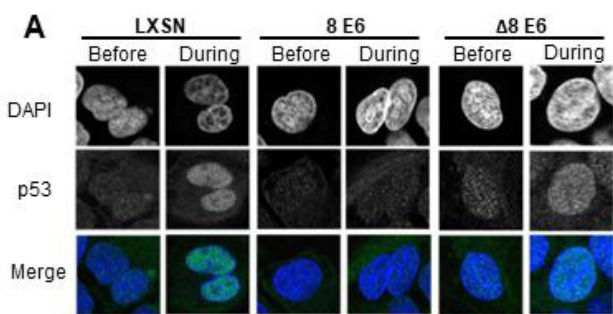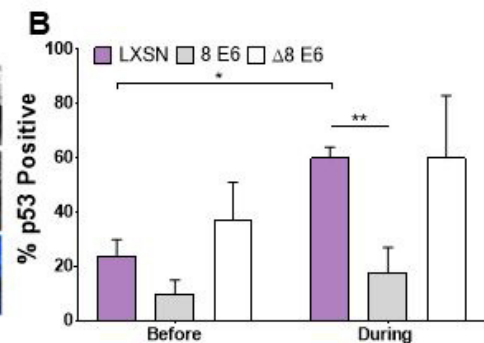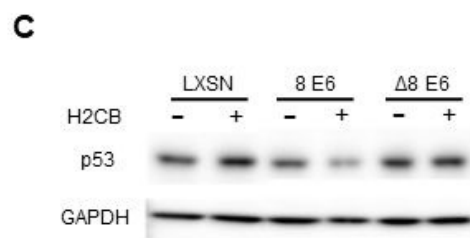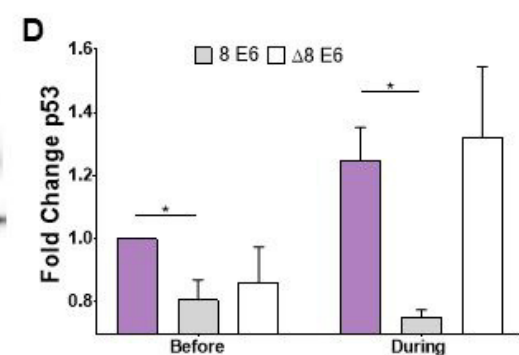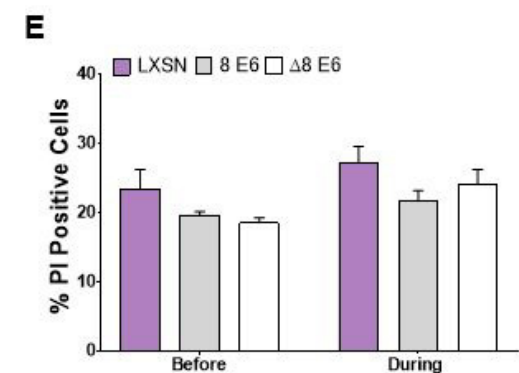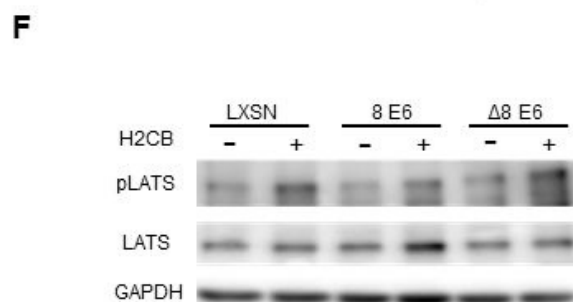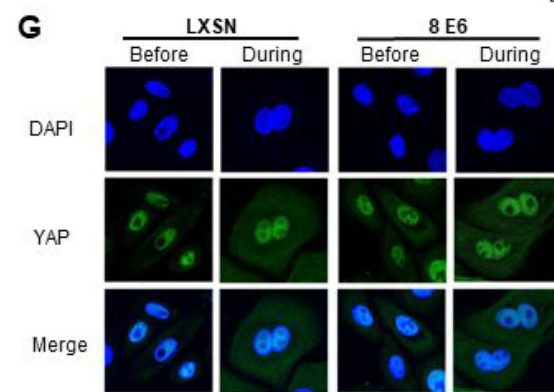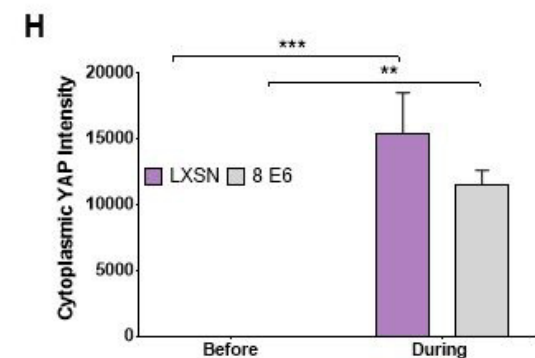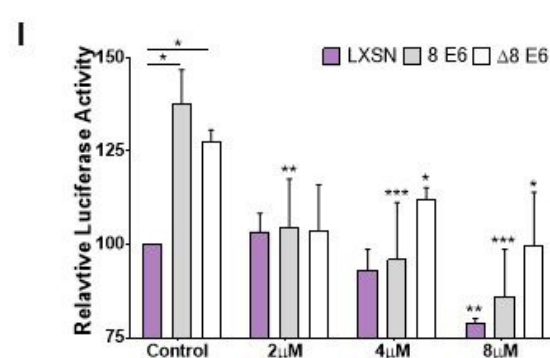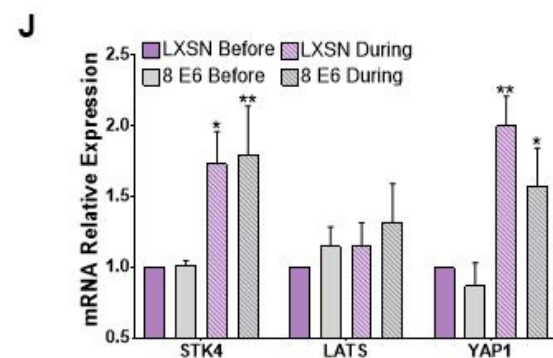

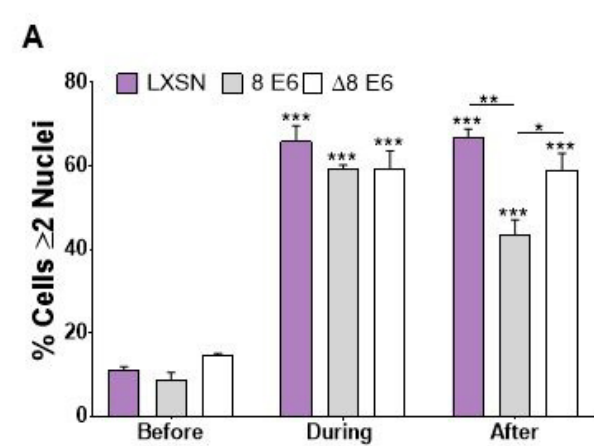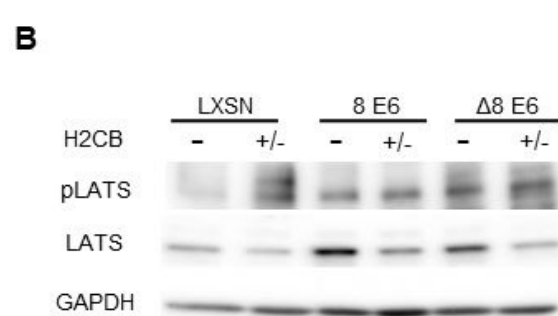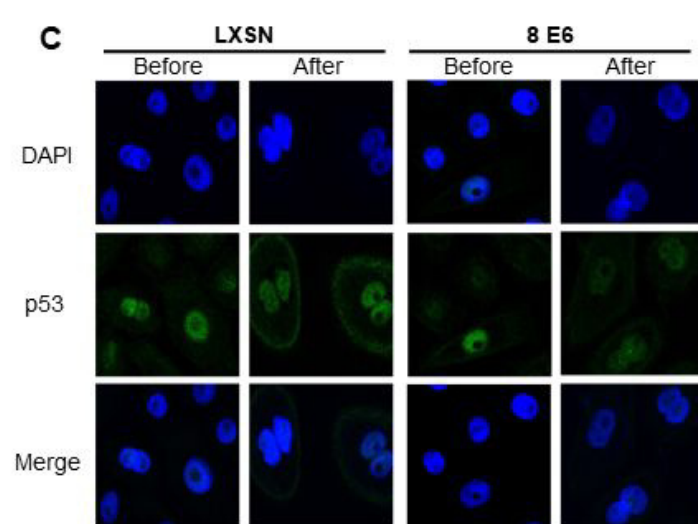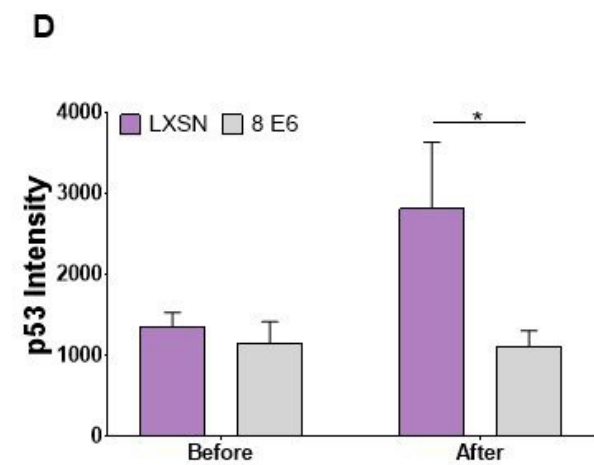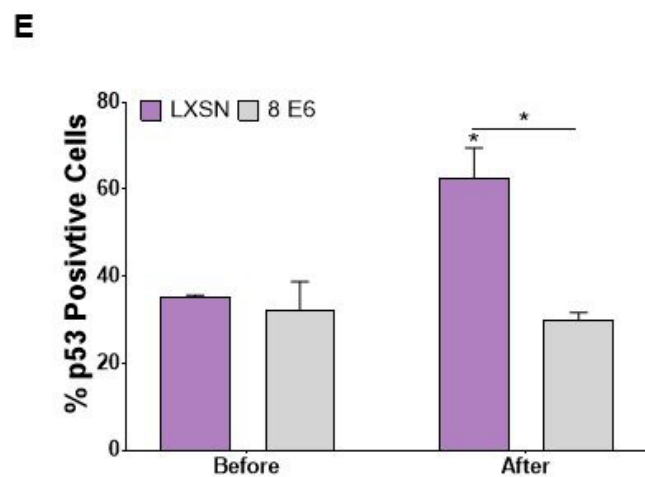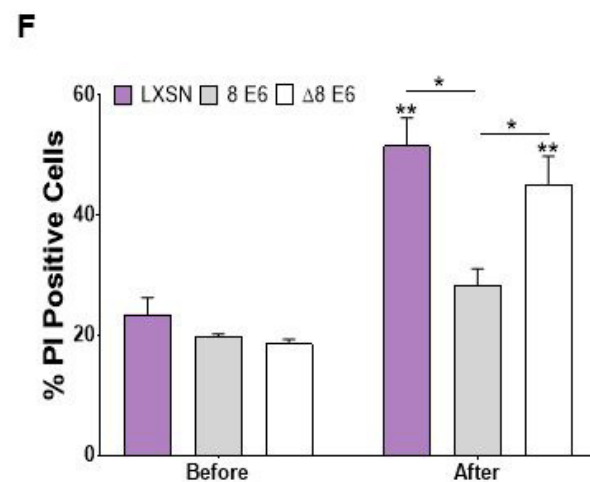

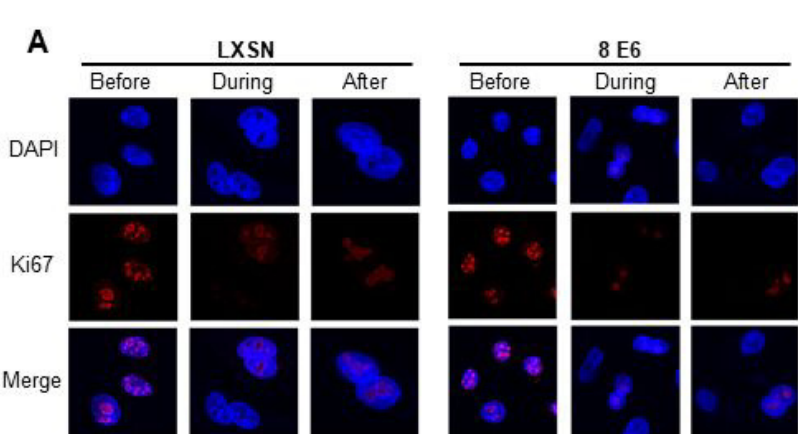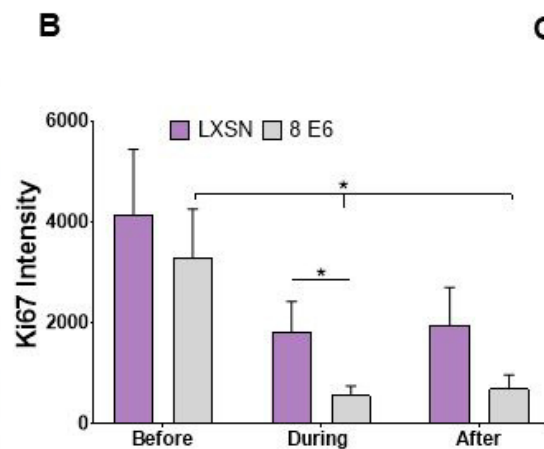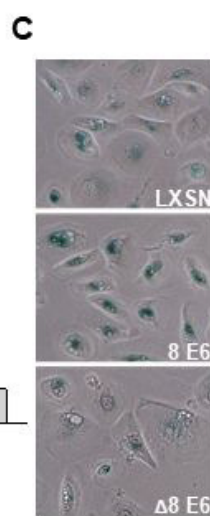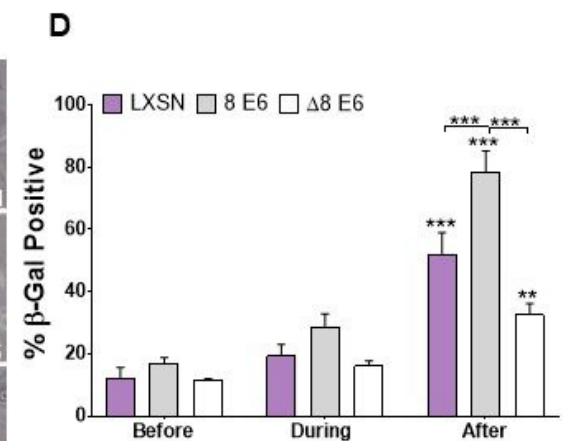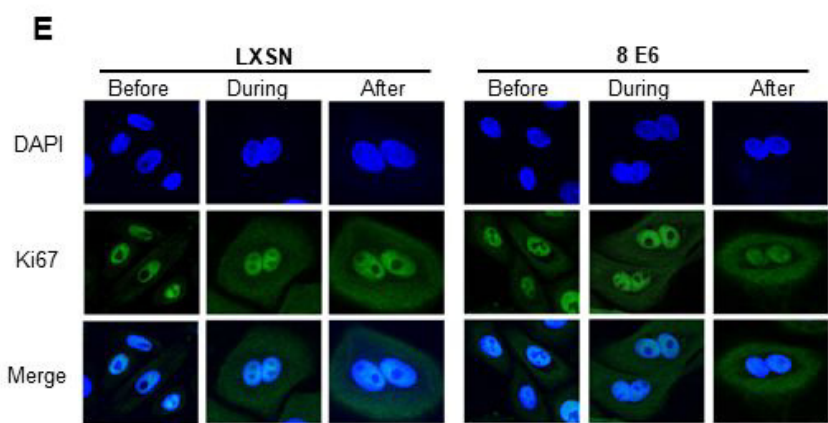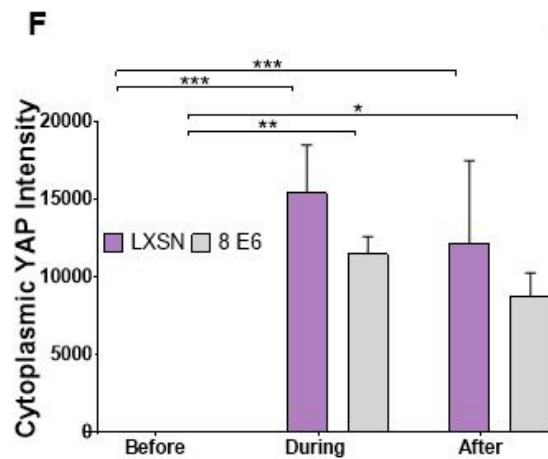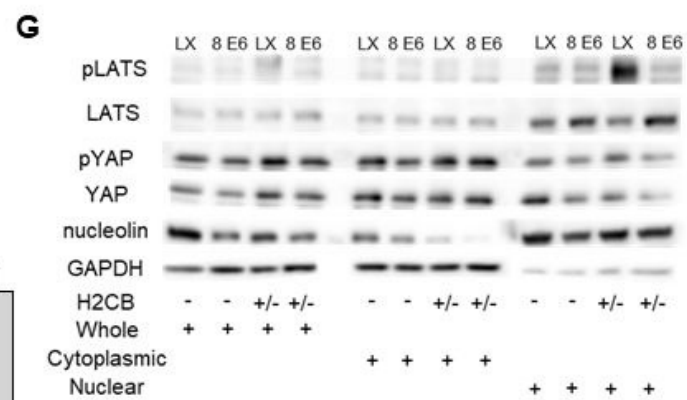

**A**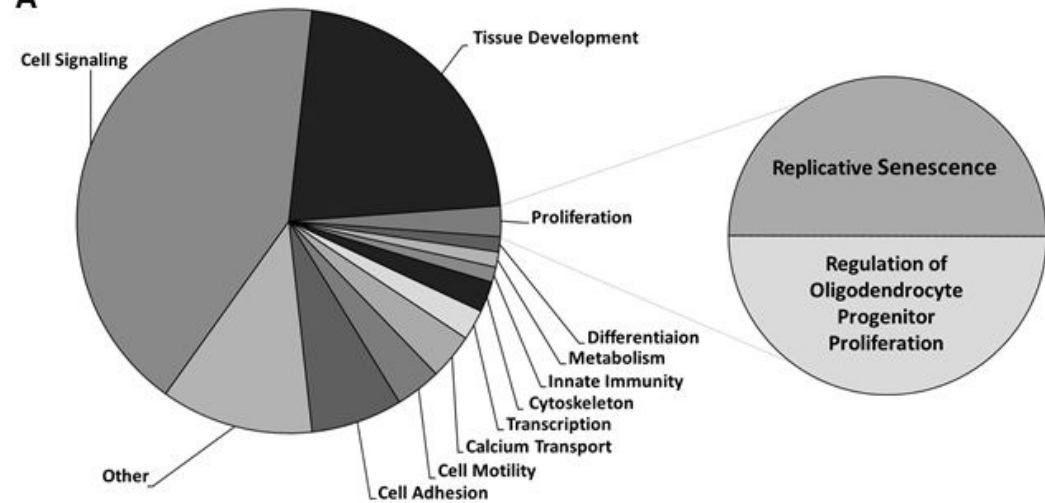**B**

| Cell Type          | % Recovered |
|--------------------|-------------|
| LXSN               | 0% (3/3)    |
| 8 E6               | 0% (3/3)    |
| LXSN + <i>TERT</i> | 100% (3/3)  |
| 8 E6 + <i>TERT</i> | 100% (3/3)  |

**C**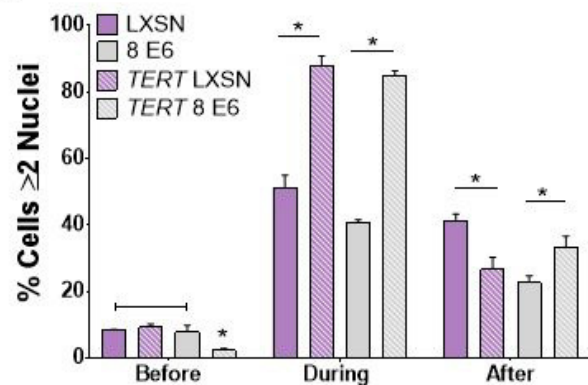**D**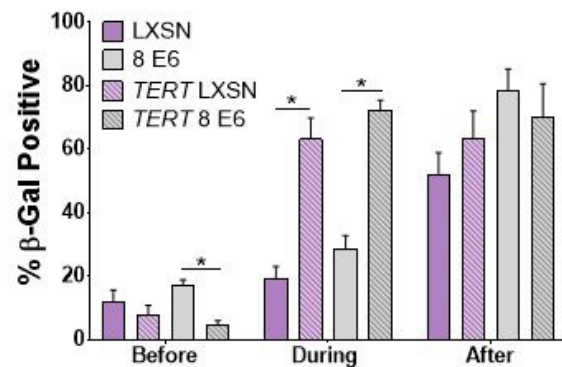**E**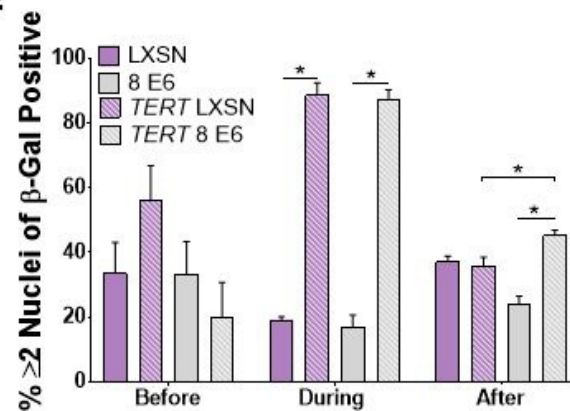



**A**

| Cell Type          | % Recovered |
|--------------------|-------------|
| LXSN               | 0% (0/3)    |
| 8 E6               | 0% (0/3)    |
| LXSN + <i>TERT</i> | 33% (1/3)   |
| 8 E6 + <i>TERT</i> | 100% (3/3)  |

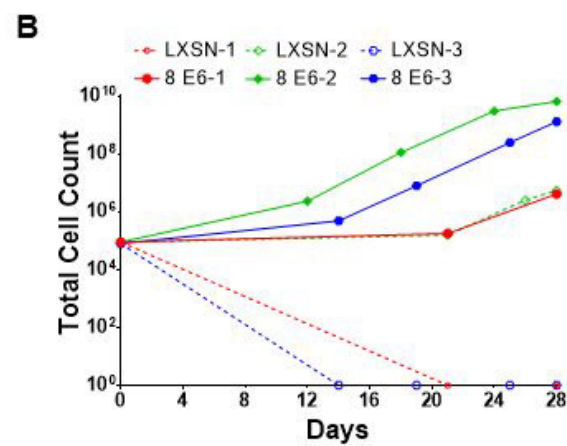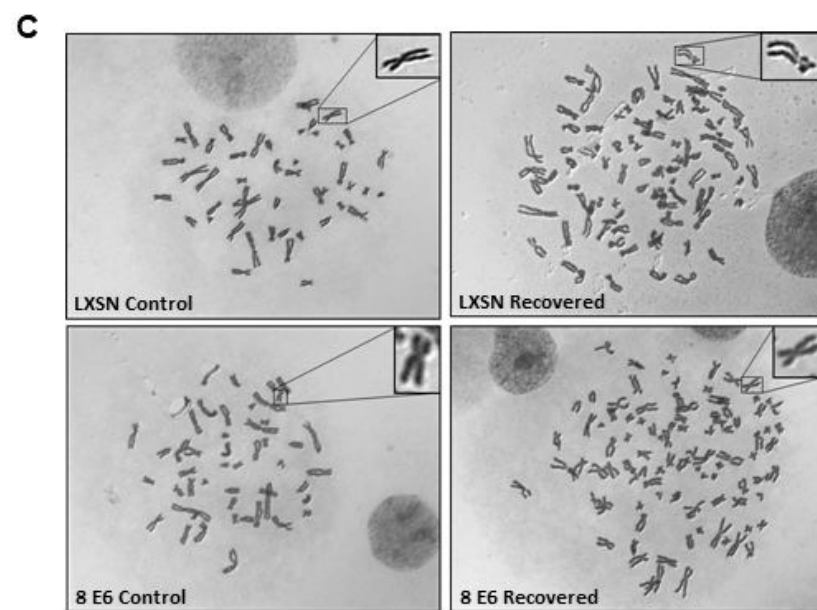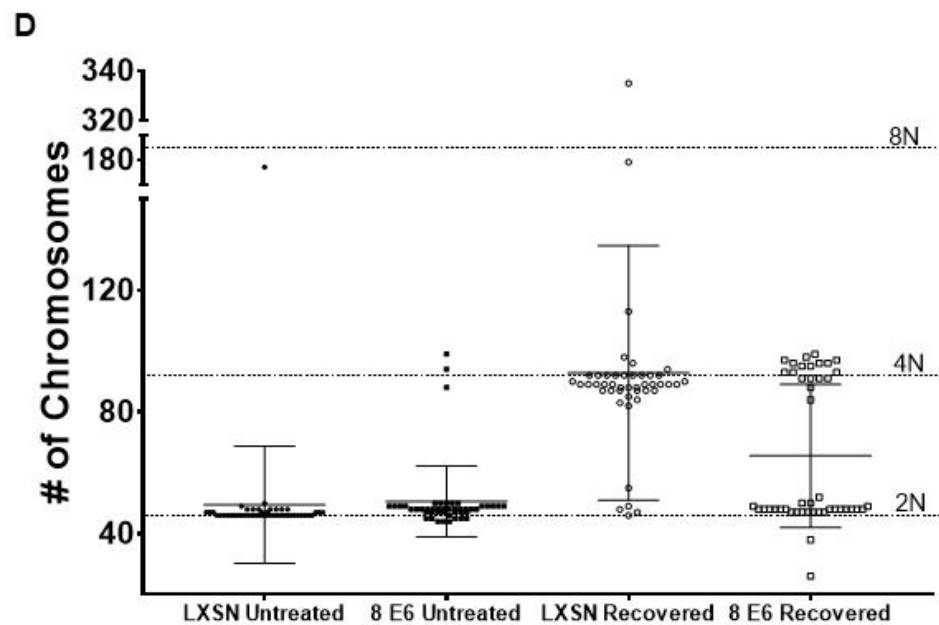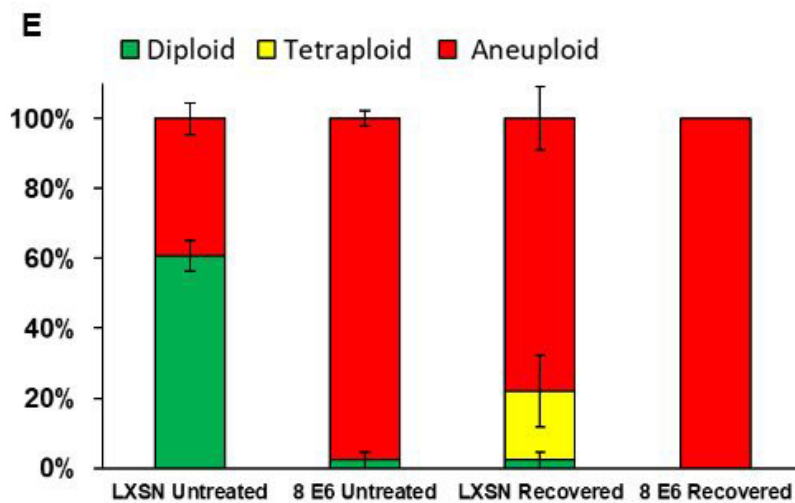

**A**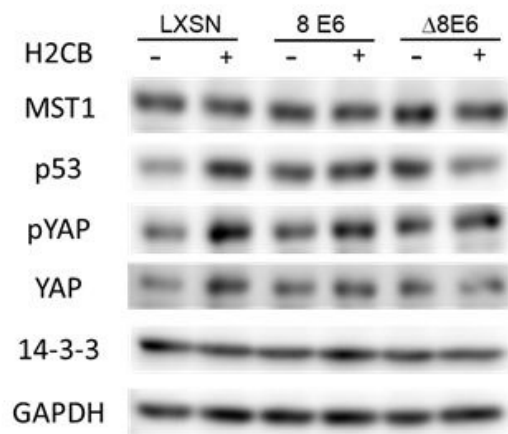**B**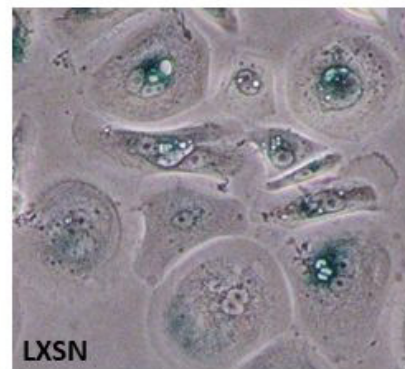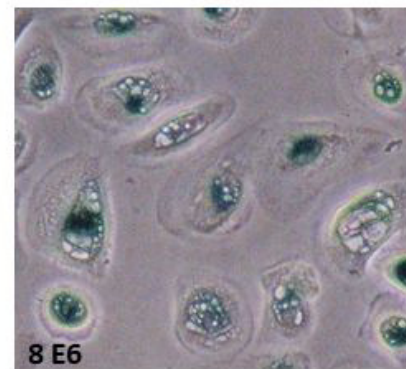

Source: https://www.biorxiv.org/content/10.1101/760439.full.pdf
